# Supplementary material for: Salicylidene-based dual-responsive ‘turn on’ fluorometric chemosensors for the selective detection of Zn 2+ , Al 3+ and F − ions: theoretical investigation and applications in the live cell imaging of zebrafish larvae and molecular logic gate operation
Source: Royal Society of Chemistry journal article supplement (doi:10.1039/d4tb01356e), 2024-11-13
Supplement: d4tb01356e1.pdf [file d4tb01356e1.pdf]

**ELECTRONIC SUPPLEMENTARY INFORMATION**

**Salicylidene-based dual-responsive 'turn on' fluorometric chemosensors for the selective detection of Zn<sup>2+</sup>, Al<sup>3+</sup> and F<sup>-</sup> ions: theoretical investigation and applications in the live cell imaging of zebrafish larvae and molecular logic gate operation**

**Abbas Khaja Raees Ahmed,<sup>a</sup> Ramalingam Gajendhiran,<sup>a</sup> Sivaraj Mithra,<sup>b</sup> Seepoo Abdul Majeed,<sup>b</sup> Azeez Sait Sahul Hameed,<sup>b</sup> Rajakkani Paulpandiyan,<sup>c</sup> Subbaiah Maniyammai,<sup>d</sup> Gurusamy Thangavelu Senthil Andavan,<sup>d</sup> Mohamed Hanifa Nizam Mohideen,<sup>e</sup> and Aziz Kalilur Rahiman<sup>\*a</sup>**

*<sup>a</sup>Post-Graduate and Research Department of Chemistry, The New College,  
University of Madras, Chennai - 600 014, India*

*<sup>b</sup>Department of Zoology and Aquatic Animal Health Laboratory, C. Abdul Hakeem College,  
Melvisharam - 632 509, India*

*<sup>c</sup>Research Department of Chemistry, VHNSN College,  
Virudhunagar - 626 001, India*

*<sup>d</sup>Department of Chemistry, SRM Institute of Science and Technology, Kattankulathur,  
Chennai - 603 203, India*

*<sup>e</sup>Post-Graduate and Research Department of Physics, The New College,  
University of Madras, Chennai - 600 014, India*

*\*E-mail address: [akrahmanjkr@gmail.com](mailto:akrahmanjkr@gmail.com); [kalilurrahiman@thenewcollege.edu.in](mailto:kalilurrahiman@thenewcollege.edu.in)*

---

**Table S1** Crystal data and structure refinement details for chemosensors R1 and R3

|                                                  |                                                                                    |                                                                      |
|--------------------------------------------------|------------------------------------------------------------------------------------|----------------------------------------------------------------------|
| Empirical Formula                                | C <sub>15</sub> H <sub>12</sub> N <sub>4</sub> Br <sub>2</sub> O <sub>3</sub> (R1) | C <sub>21</sub> H <sub>28</sub> N <sub>4</sub> O <sub>6</sub> S (R3) |
| Formula weight                                   | 456.11                                                                             | 464.53                                                               |
| Crystal system                                   | Orthorhombic                                                                       | Monoclinic                                                           |
| Space group                                      | <i>Pbcn</i>                                                                        | <i>P2<sub>1</sub>/n</i>                                              |
| Temperature (K)                                  | 293(2)                                                                             | 273.15                                                               |
| a (Å)                                            | 3.8523(10)                                                                         | 9.5427(8)                                                            |
| b (Å)                                            | 12.8505(4)                                                                         | 18.3688(16)                                                          |
| c (Å)                                            | 36.4286(11)                                                                        | 14.1766(12)                                                          |
| α (°)                                            | 90                                                                                 | 90                                                                   |
| β (°)                                            | 90                                                                                 | 95.890(3)                                                            |
| γ (°)                                            | 90                                                                                 | 90                                                                   |
| Volume (Å <sup>3</sup> )                         | 1803.36(9)                                                                         | 2471.9(4)                                                            |
| Z/Z'                                             | 4/0.5                                                                              | 4/1                                                                  |
| Calculated density (mg m <sup>-3</sup> )         | 1.680                                                                              | 1.248                                                                |
| Absorption coefficient (mm <sup>-1</sup> )       | 4.515                                                                              | 0.172                                                                |
| Crystal size (mm)                                | 0.42 × 0.21 × 0.15                                                                 | 0.24 × 0.18 × 0.12                                                   |
| F(000)                                           | 896                                                                                | 984                                                                  |
| θ Range for data collection (°)                  | 4.472 to 57.526                                                                    | 4.434 to 54.258                                                      |
| Limiting indices                                 | -3 ≤ h ≤ 5, -17 ≤ k ≤ 17,<br>-49 ≤ l ≤ 49                                          | -11 ≤ h ≤ 12, -23 ≤ k ≤ 23,<br>-18 ≤ l ≤ 18                          |
| Reflections collected                            | 27,732                                                                             | 48,905                                                               |
| Independent reflections                          | 2351 [R(int) = 0.0462,<br>R(sigma) = 0.0272]                                       | 5458 [R(int) = 0.0629,<br>R(sigma) = 0.0376]                         |
| Data/restraints/parameters                       | 2351/0/118                                                                         | 2423/0/181                                                           |
| Goodness of fit on F <sup>2</sup>                | 1.198                                                                              | 1.024                                                                |
| Final R indices                                  | R1 = 0.0579, wR2 = 0.1206                                                          | R1 = 0.0597, wR2 = 0.1561                                            |
| R indices (all data)                             | R1 = 0.0674, wR2 = 0.1246                                                          | R1 = 0.0769, wR2 = 0.1715                                            |
| Largest diff. peak and hole (e.Å <sup>-3</sup> ) | 0.79 and -0.66                                                                     | 0.46 and -0.33                                                       |

**Table S2** Selected bond length (Å), bond angle (°) and torsional angle (°) values of the chemosensors R1 and R3

| Bonds length (Å)    | R1        | R3         |
|---------------------|-----------|------------|
| O(1)–C(6)           | 1.226(7)  | 1.230(2)   |
| N(1)–C(5)           | 1.277(6)  | 1.273(3)   |
| N(2)–C(6)           | 1.354(5)  | 1.357(3)   |
| N(1)–N(2)           | 1.364(5)  | 1.372(3)   |
| C(7)–C(8)           | 1.377(6)  | 1.371(4)   |
| O(2)–C(3)           | 1.355(6)  | 1.356(2)   |
| Bond angle (°)      |           |            |
| C(6)–N(2)–N(1)      | 118.9(4)  | 119.7(17)  |
| C(5)–N(1)–N(2)      | 117.1(4)  | 116.7(17)  |
| O(1)–C(6)–N(2)      | 123.3(3)  | 121.2(18)  |
| N(2A)–C(6)–N(2)     | 113.4(6)  | 115.0(18)  |
| Torsional angle (°) |           |            |
| C(5)–N(1)–N(2)–C(6) | 178.6(4)  | –171.3(19) |
| N(2)–N(1)–C(5)–C(4) | –179.2(5) | –179.8(18) |
| N(1)–N(2)–C(6)–O(1) | –1.0(6)   | 178.2(19)  |

**Table S3** Hydrogen bonding geometry for the chemosensor R1 (Å and °)

| D–H···A           | d(D–H)  | d(H···A) | d(D···A) | <D–H···A |
|-------------------|---------|----------|----------|----------|
| O(2)–H(2B)···N(1) | 0.85(7) | 1.89(7)  | 2.625(5) | 145(7)   |

**Table S4** Hydrogen bonding geometry for the chemosensor R3 (Å and °)

| D–H···A                             | d(D–H) | d(H···A) | d(D···A) | <D–H···A |
|-------------------------------------|--------|----------|----------|----------|
| O(2)–H(2)···O(3)                    | 0.82   | 2.17     | 2.6310   | 115      |
| O(2)–H(2)···O(4) <sup>(i)</sup>     | 0.82   | 1.99     | 2.7155   | 148'     |
| N(2)–H(2A)···O(1) <sup>(ii)</sup>   | 0.85   | 2.04     | 2.8869   | 176      |
| N(2A)–H(2AA)···N(1)                 | 0.86   | 2.26     | 2.6114   | 105      |
| N2A–H(2AA)···O(4) <sup>(iii)</sup>  | 0.86   | 2.37     | 3.1387   | 150'     |
| O(2A)–H(2AB)···N(1A)                | 0.82   | 1.91     | 2.6306   | 146      |
| C(5A)–H(5A)···O(4) <sup>(iii)</sup> | 0.93   | 2.45     | 3.2197   | 153      |
| C(8A)–H(8A)···O(2) <sup>(iv)</sup>  | 0.93   | 2.55     | 3.4218   | 156      |
| C(11)–H(11C)···O(2A) <sup>(v)</sup> | 0.96   | 2.50     | 3.2813   | 139      |
| C(12)–H(12B)···O(3A) <sup>(v)</sup> | 0.96   | 2.57     | 3.4809   | 158      |
| C(12)–H(12C)···O(2) <sup>(vi)</sup> | 0.96   | 2.58     | 3.3108   | 133      |
| O(2)–H(2)···O(3)                    | 0.82   | 2.17     | 2.6310   | 115      |

Symmetry code: (i)  $1 + x, y, -1 + z$  (ii)  $2 - x, -y, -z$   
 (iii)  $1/2 + x, 1/2 - y, -1/2 + z$  (iv)  $-1/2 + x, 1/2 - y, 1/2 + z$   
 (v)  $1 - x, -y, 1 - z$  (vi)  $-1 + x, y, 1 + z$

**Table S5** Selected bond length (Å) values of the chemosensors R1 and R2, and upon interaction with Zn<sup>2+</sup> and Al<sup>3+</sup> cations (R1 + Zn<sup>2+</sup>, R1 + Al<sup>3+</sup> and R2 + Zn<sup>2+</sup>) calculated using theoretical studies

| Parameters | R1    | R1 + Zn <sup>2+</sup> | R1 + Al <sup>3+</sup> | R2    | R2 + Zn <sup>2+</sup> |
|------------|-------|-----------------------|-----------------------|-------|-----------------------|
| C5–O8      | 1.386 | 1.323                 | 1.337                 | 1.384 | 1.299                 |
| C7–N9      | 1.305 | 1.458                 | 1.470                 | 1.306 | 1.425                 |
| C11–O12    | 1.245 | 1.421                 | 1.452                 | –     | –                     |
| C14–N15    | 1.306 | 1.457                 | 1.469                 | –     | –                     |
| C21–O22    | 1.397 | 1.513                 | 1.566                 | –     | –                     |
| C11–S24    | –     | –                     | –                     | 1.709 | 1.825                 |
| C16–O21    | –     | –                     | –                     | 1.396 | 1.293                 |
| N13–C14    | –     | –                     | –                     | 1.307 | 1.429                 |

**Table S6** Selected bond length (Å) values of the chemosensors R3 and R4, and upon interaction with Zn<sup>2+</sup> and Al<sup>3+</sup> cations (R3 + Zn<sup>2+</sup>, R3 + Al<sup>3+</sup> and R4 + Zn<sup>2+</sup>) calculated using theoretical studies

| Parameters | R3    | R3 + Zn <sup>2+</sup> | R3 + Al <sup>3+</sup> | R4    | R4 + Zn <sup>2+</sup> |
|------------|-------|-----------------------|-----------------------|-------|-----------------------|
| C5–O8      | 1.386 | 1.369                 | 1.342                 | 1.373 | 1.361                 |
| C7–N9      | 1.305 | 1.438                 | 1.453                 | 1.296 | 1.424                 |
| C11–O22    | 1.241 | 1.379                 | 1.382                 | –     | –                     |
| C16–O21    | 1.397 | 1.315                 | 1.330                 | –     | –                     |
| N13–C14    | 1.306 | 1.440                 | 1.449                 | –     | –                     |
| C13–S16    | –     | –                     | –                     | 1.709 | 1.890                 |
| C19–O24    | –     | –                     | –                     | 1.384 | 1.314                 |
| N15–C17    | –     | –                     | –                     | 1.299 | 1.436                 |

**Table S7** Selected bond length ( $\text{\AA}$ ) values of the chemosensors R1 and R2, and upon interaction with  $\text{F}^-$  anion ( $\text{R1} + \text{F}^-$  and  $\text{R2} + \text{F}^-$ ) calculated using theoretical studies

| Parameters | R1    | R1 + $\text{F}^-$ | R2    | R2 + $\text{F}^-$ |
|------------|-------|-------------------|-------|-------------------|
| N10–H31    | 1.023 | 1.520             | –     | –                 |
| N13–H30    | 1.018 | 1.022             | –     | –                 |
| O8–H36     | 0.980 | 0.971             | –     | –                 |
| O22–H25    | 0.978 | 0.971             | –     | –                 |
| N10–H29    | –     | –                 | 1.026 | 1.025             |
| N12–H30    | –     | –                 | 1.018 | 1.522             |
| O8–H28     | –     | –                 | 0.980 | 0.970             |

**Table S8** Selected bond length ( $\text{\AA}$ ) values of the chemosensors R3 and R4, and upon interaction with  $\text{F}^-$  anion ( $\text{R3} + \text{F}^-$  and  $\text{R4} + \text{F}^-$ ) calculated using theoretical studies

| Parameters | R3    | R3 + $\text{F}^-$ | R4    | R4 + $\text{F}^-$ |
|------------|-------|-------------------|-------|-------------------|
| N10–H31    | 1.023 | 1.023             | –     | –                 |
| N12–H32    | 1.018 | 1.526             | –     | –                 |
| O8–H30     | 0.980 | .970              | –     | –                 |
| O21–H36    | 0.978 | 0.971             | –     | –                 |
| N12–H36    | –     | –                 | 1.020 | 1.509             |
| N14–H37    | –     | –                 | 1.011 | 1.025             |
| O8–H33     | –     | –                 | 0.980 | 0.970             |
| O21–H42    | –     | –                 | 0.978 | 0.970             |

**Table S9** Selected bond angle ( $^{\circ}$ ) values of the chemosensors R1 and R2, and upon interaction with  $Zn^{2+}$  and  $Al^{3+}$  cations ( $R1 + Zn^{2+}$ ,  $R1 + Al^{3+}$  and  $R2 + Zn^{2+}$ ) calculated using theoretical studies

| Parameters  | R1      | $R1 + Zn^{2+}$ | $R1 + Al^{3+}$ | R2      | $R2 + Zn^{2+}$ |
|-------------|---------|----------------|----------------|---------|----------------|
| C7–N9–N10   | 115.923 | 124.752        | 123.538        | 115.431 | 118.512        |
| N10–C11–O12 | 127.693 | 120.066        | 120.884        | –       | –              |
| N13–C11–O12 | 119.957 | 122.879        | 122.412        | –       | –              |
| N13–N14–C15 | 122.258 | 117.624        | 118.378        | –       | –              |
| N10–C11–S24 | –       | –              | –              | 128.504 | 127.891        |
| N12–C11–S24 | –       | –              | –              | 119.262 | 117.775        |
| N12–N13–C14 | –       | –              | –              | 121.922 | 120.111        |

**Table S10** Selected bond angle ( $^{\circ}$ ) values of the chemosensors R3 and R3, and upon interaction with  $Zn^{2+}$  and  $Al^{3+}$  cations ( $R3 + Zn^{2+}$ ,  $R3 + Al^{3+}$  and  $R4 + Zn^{2+}$ ) calculated using theoretical studies

| Parameters  | R3      | $R3 + Zn^{2+}$ | $R3 + Al^{3+}$ | R4      | $R4 + Zn^{2+}$ |
|-------------|---------|----------------|----------------|---------|----------------|
| C7–N9–N10   | 115.923 | 125.047        | 123.173        | –       | –              |
| N10–C11–O22 | 127.693 | 120.074        | 120.073        | –       | –              |
| N12–C11–O22 | 119.957 | 123.011        | 123.627        | –       | –              |
| N12–N13–C14 | 122.258 | 117.280        | 119.948        | –       | –              |
| C7–N11–N12  | –       | –              | –              | 115.578 | 121.636        |
| N12–C13–S16 | –       | –              | –              | 128.065 | 124.254        |
| N14–C13–S16 | –       | –              | –              | 119.318 | 120.740        |
| N14–N15–C17 | –       | –              | –              | 121.406 | 117.663        |

**Table S11** Selected bond angle ( $^{\circ}$ ) values of the chemosensors R1 and R2, and upon interaction with  $F^{-}$  anion ( $R1 + F^{-}$  and  $R2 + F^{-}$ ) calculated using theoretical studies

| Parameters  | R1      | R1 + $F^{-}$ | R2      | R2 + $F^{-}$ |
|-------------|---------|--------------|---------|--------------|
| C5–O8–H36   | 112.254 | 114.748      | –       | –            |
| C21–O22–H25 | 112.690 | 112.504      | –       | –            |
| N9–N10–H31  | 122.871 | 128.497      | –       | –            |
| N14–N13–H30 | 123.586 | 121.064      | –       | –            |
| C5–O8–H28   | –       | –            | 112.460 | 114.071      |
| C16–O21–H34 | –       | –            | 112.696 | 112.626      |
| N9–N10–H29  | –       | –            | 121.962 | 128.282      |
| N13–N12–H30 | –       | –            | 123.381 | 123.932      |

**Table S12** Selected bond angle ( $^{\circ}$ ) values of the chemosensors R3 and R4, and upon interaction with  $F^{-}$  anion ( $R3 + F^{-}$  and  $R4 + F^{-}$ ) calculated using theoretical studies

| Parameters  | R3      | R3 + $F^{-}$ | R4      | R4 + $F^{-}$ |
|-------------|---------|--------------|---------|--------------|
| C5–O8–H30   | 112.254 | 112.677      | –       | –            |
| C16–O21–H36 | 112.690 | 109.713      | –       | –            |
| N9–N10–H31  | 122.871 | 121.216      | –       | –            |
| N13–N12–H32 | 123.586 | 129.076      | –       | –            |
| C5–O8–H33   | –       | –            | 109.086 | 108.652      |
| C19–O24–H42 | –       | –            | 109.118 | 109.057      |
| N11–N12–H36 | –       | –            | 121.078 | 127.558      |
| N15–N14–H37 | –       | –            | 122.599 | 123.511      |



**Table S13** Absolute energies (in Hartree units) of the chemosensors (R1–R4), R1–R4 + Zn<sup>2+</sup>, R2/R4 + Al<sup>3+</sup> and R1–R4 + F<sup>−</sup> calculated using theoretical studies

| Parameters            | Absolute energy |
|-----------------------|-----------------|
| R1                    | −1049.585       |
| R1 + Zn <sup>2+</sup> | −1179.629       |
| R1 + Al <sup>3+</sup> | −1252.502       |
| R1 + F <sup>−</sup>   | −1271.397       |
| R2                    | − 984.461       |
| R2 + Zn <sup>2+</sup> | −1235.634       |
| R2 + F <sup>−</sup>   | −1494.372       |
| R3                    | −938.295        |
| R3 + Zn <sup>2+</sup> | −1311.755       |
| R3 + Al <sup>3+</sup> | −1484.632       |
| R3 + F <sup>−</sup>   | −1432.082       |
| R4                    | −1055.222       |
| R4 + Zn <sup>2+</sup> | −1246.642       |
| R4 + F <sup>−</sup>   | −1355.059       |

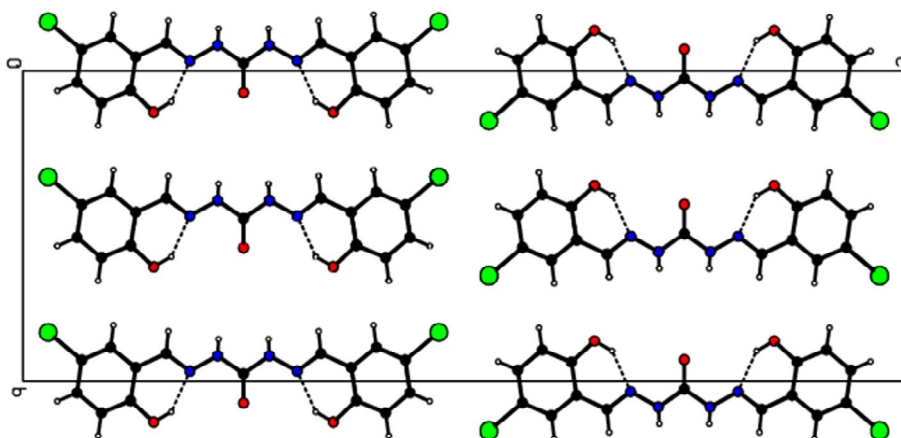

**Fig. S1** Crystal packing diagram of the chemosensor R1 along the crystallographic *a*-axis.

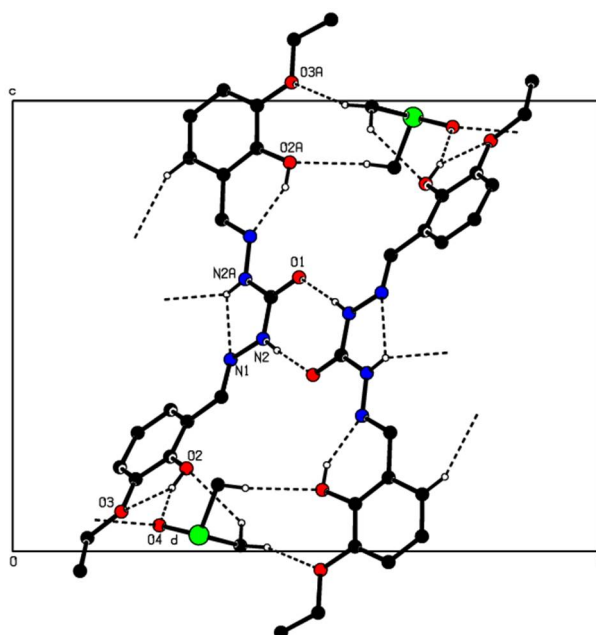

**Fig. S2** Crystal lattice packing diagram of the chemosensor R3 showing O–H $\cdots$ O and O–H $\cdots$ N intramolecular hydrogen bonding interaction along *a*-axis.

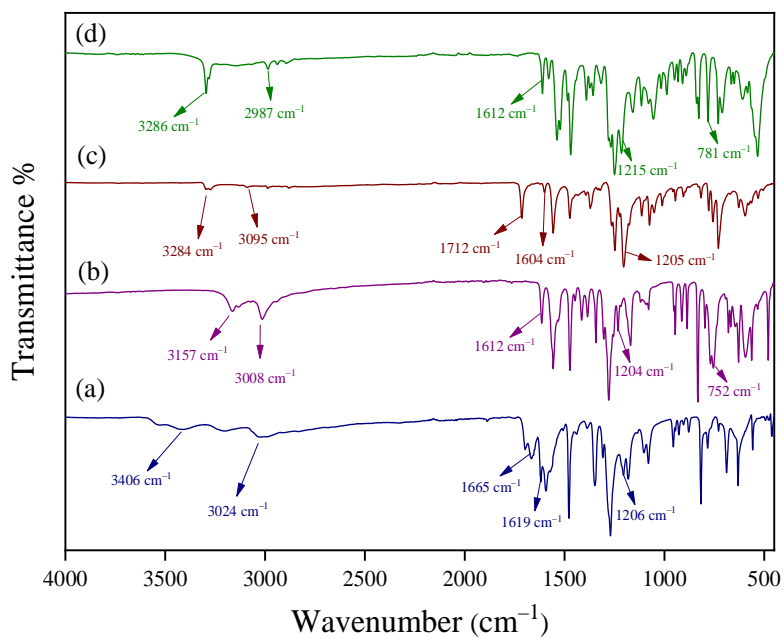

**Fig. S3** FT IR spectra of the chemosensors R1 (a), R2 (b), R3 (c) and R4 (d).

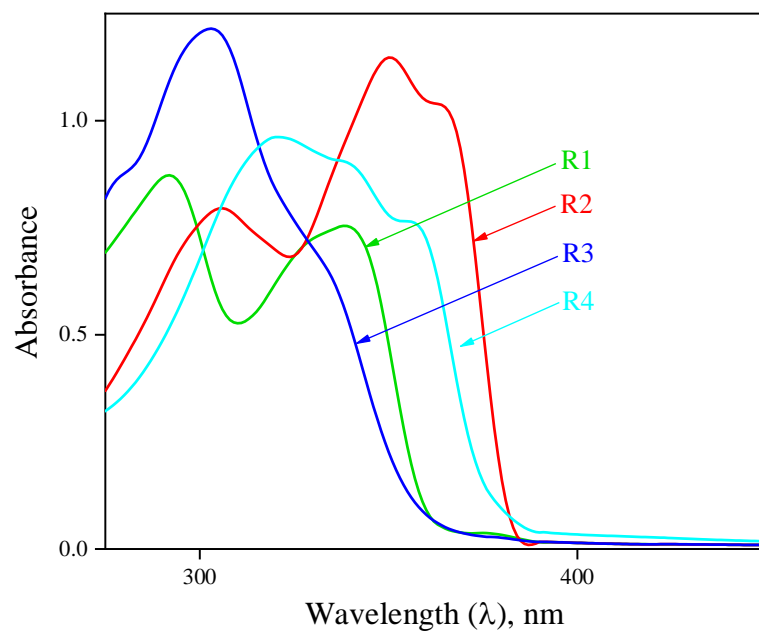

**Fig. S4** UV-Vis spectra of the chemosensors (R1–R4).

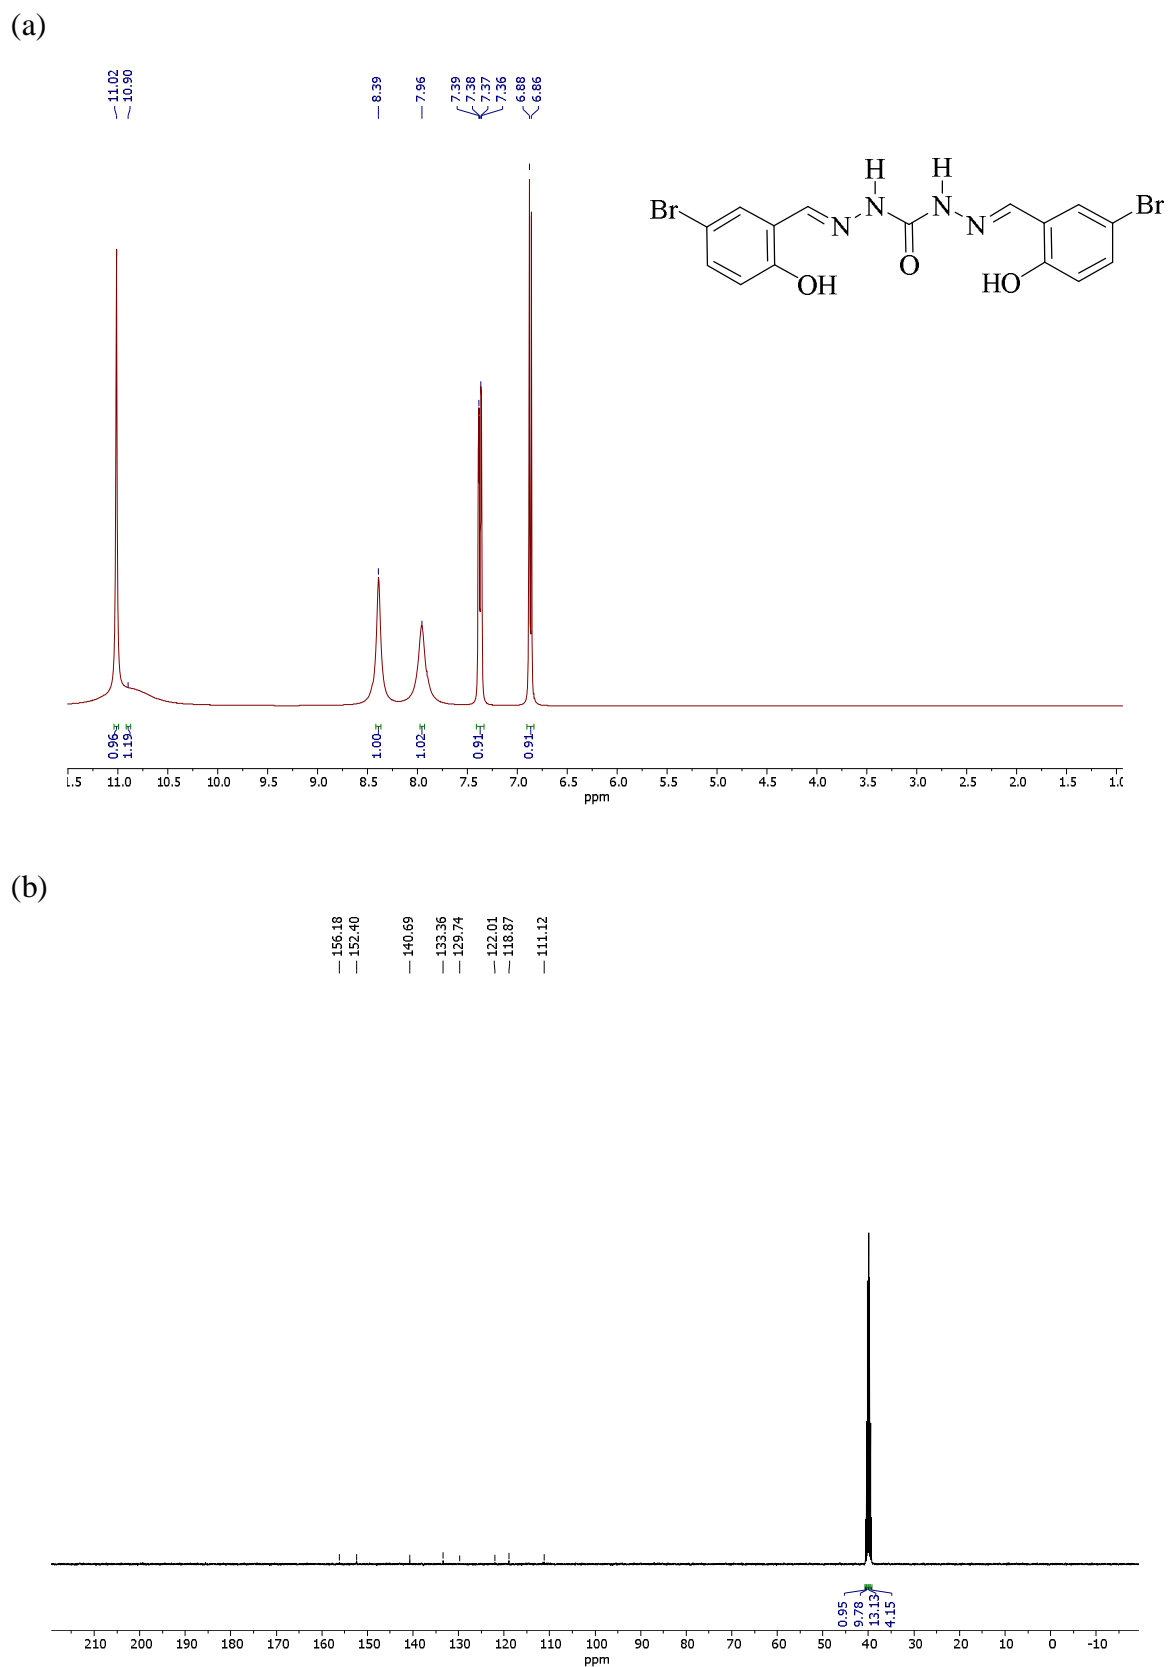

**Fig. S5**  $^1\text{H}$  (a) and  $^{13}\text{C}$  (b) NMR spectra of the chemosensor R1.

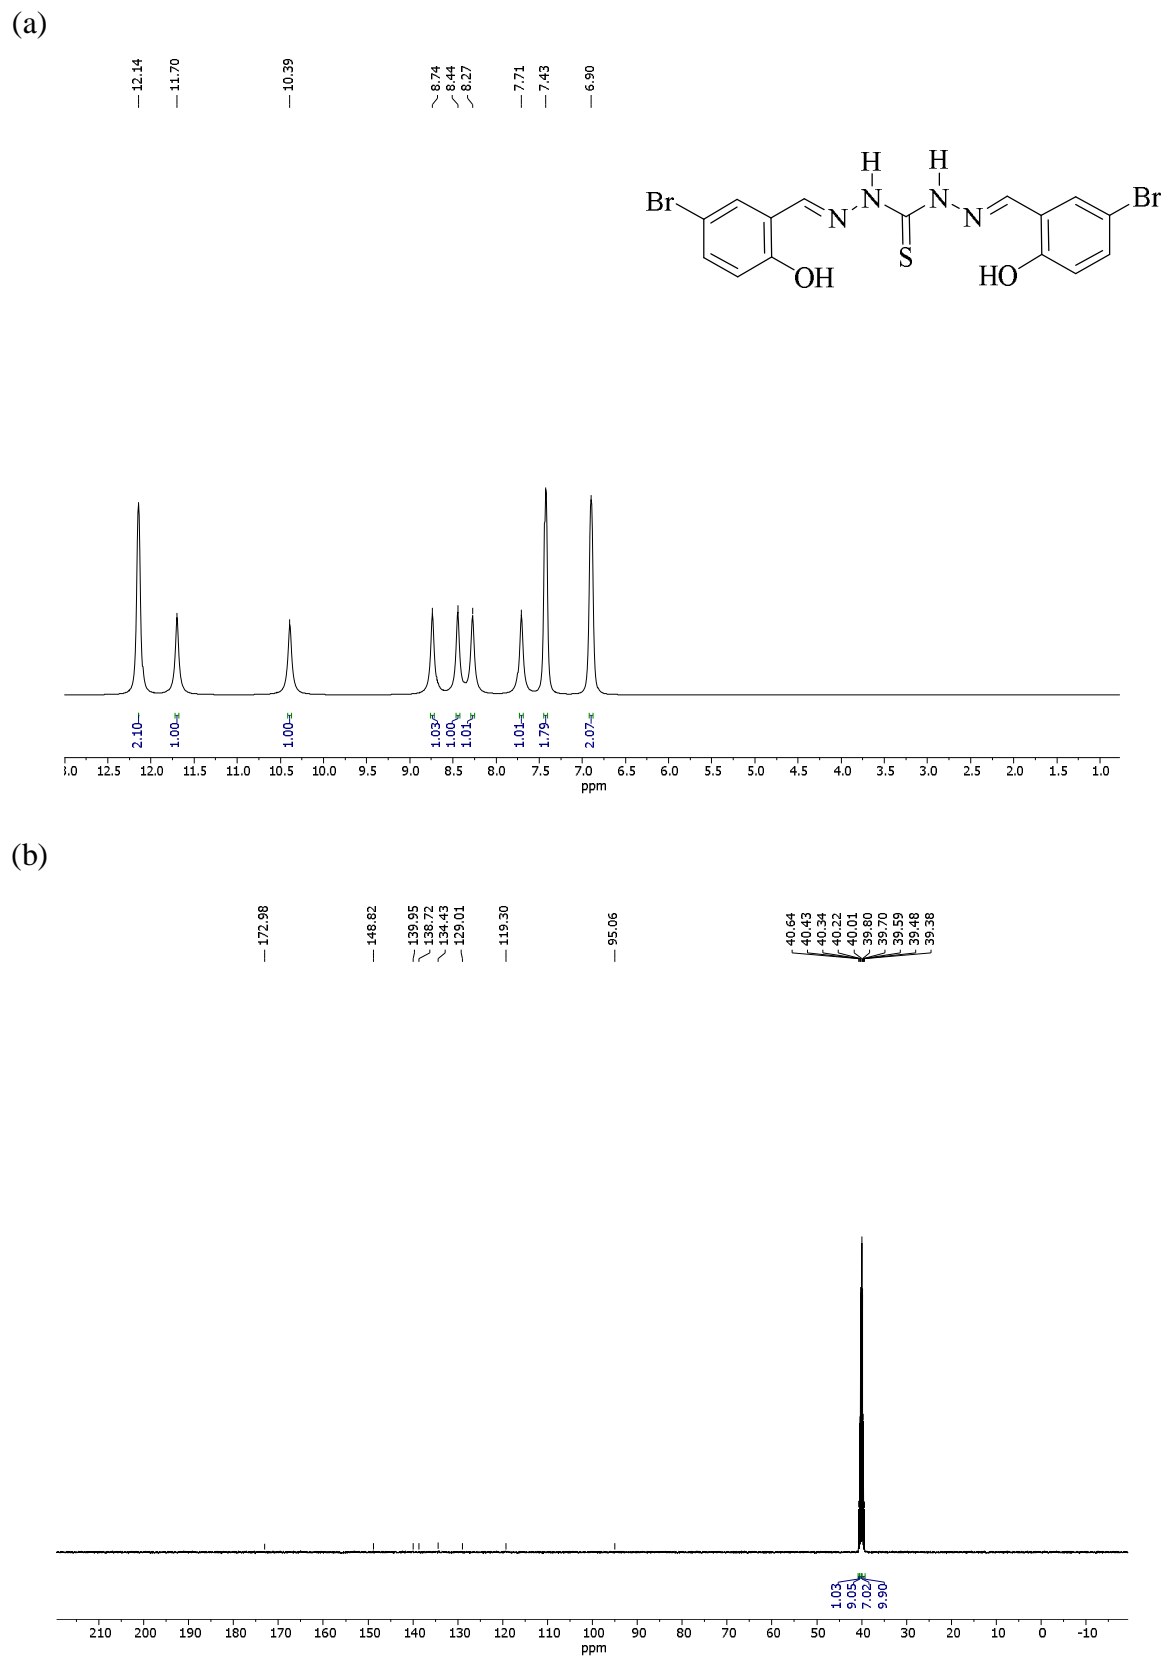

**Fig. S6**  $^1\text{H}$  (a) and  $^{13}\text{C}$  (b) NMR spectra of the chemosensor R2.

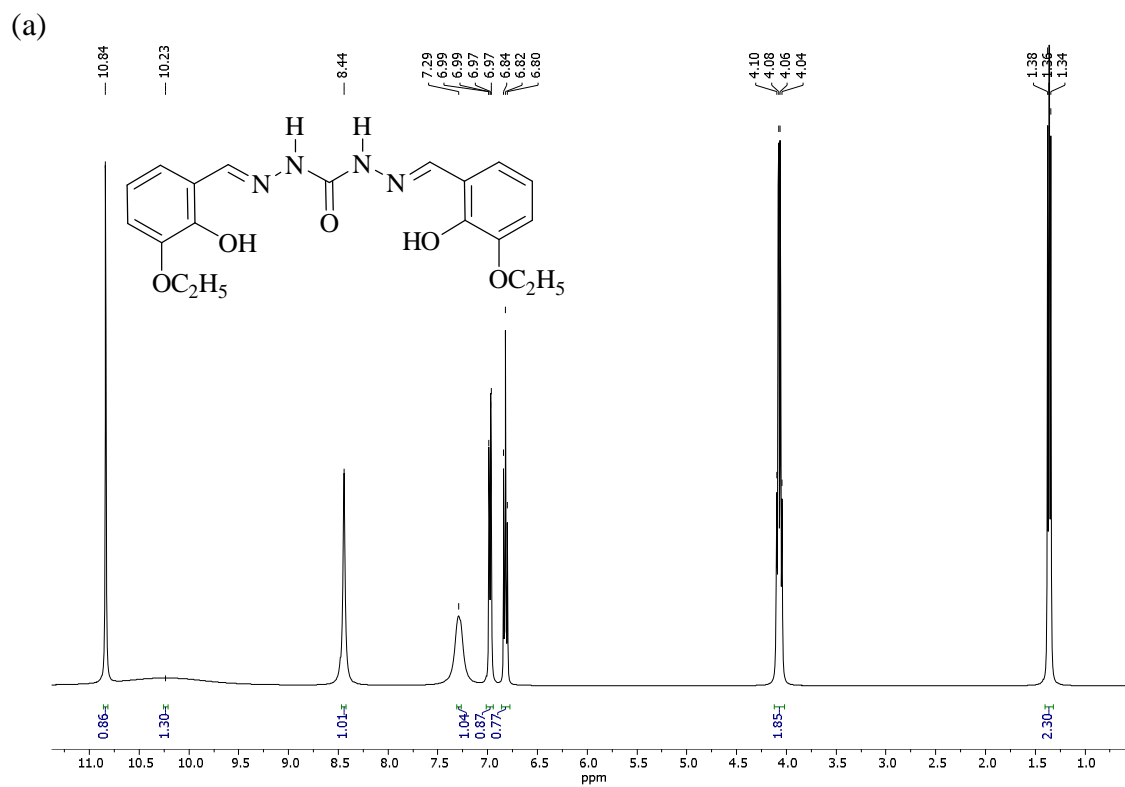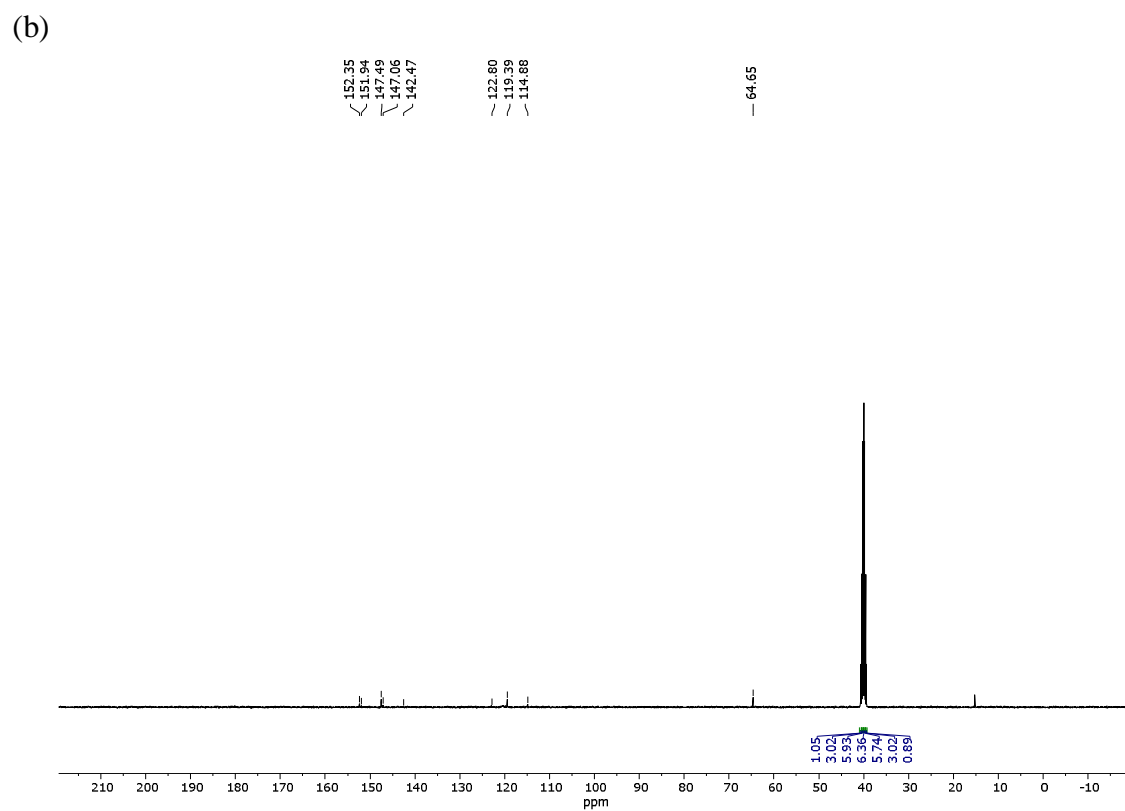

**Fig. S7**  $^1\text{H}$  (a) and  $^{13}\text{C}$  (b) NMR spectra of the chemosensor R3.

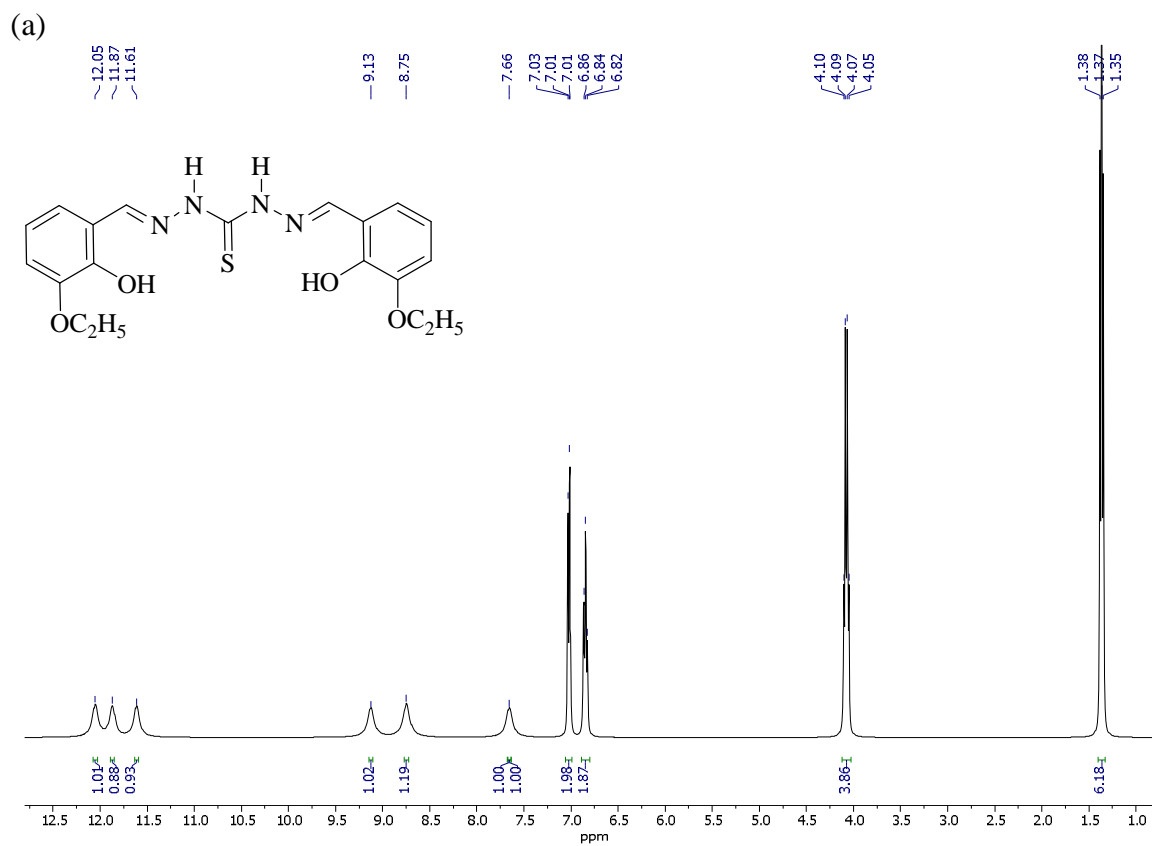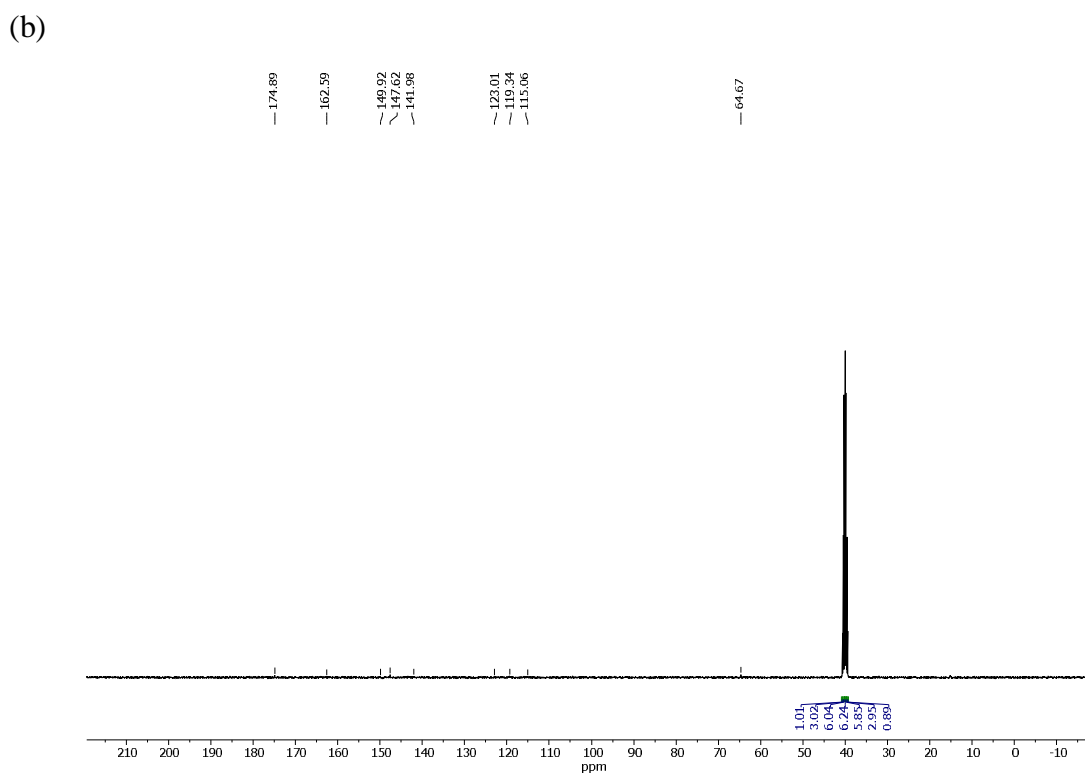

**Fig. S8**  $^1\text{H}$  (a) and  $^{13}\text{C}$  (b) NMR spectra of the chemosensor R4.

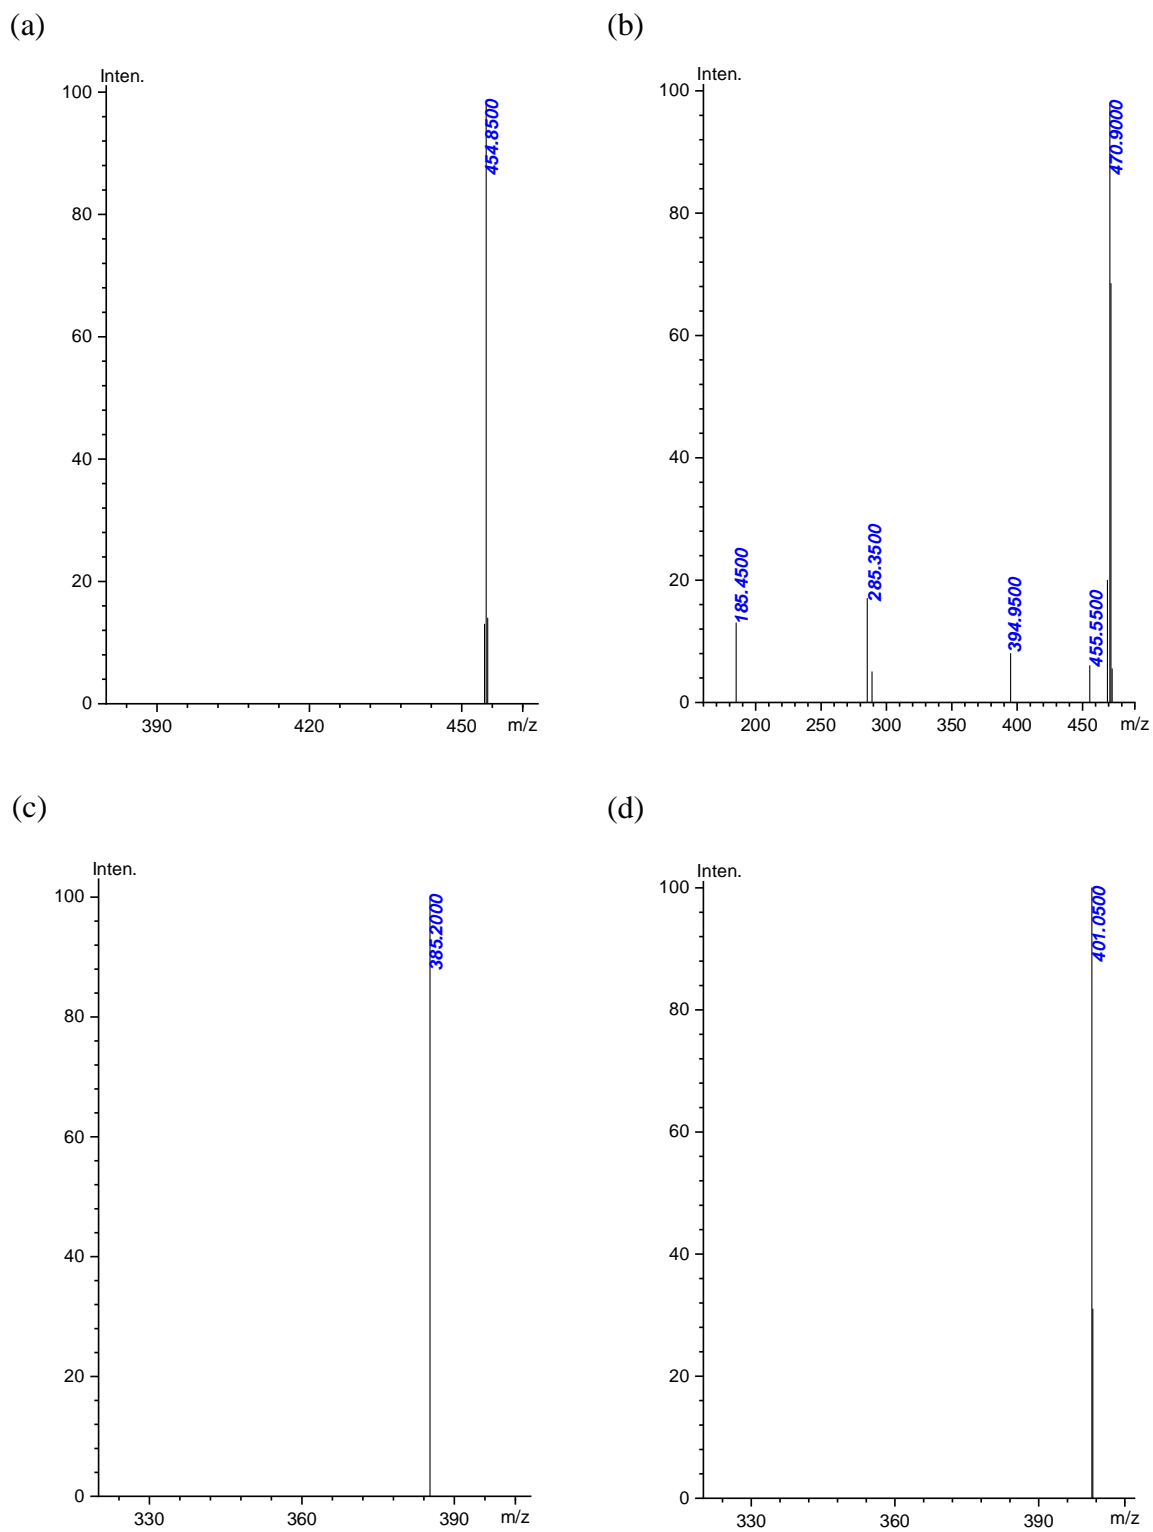

**Fig. S9** LC-MS spectra of the chemosensors R1 (a), R2 (b), R3 (c) and R4 (d).



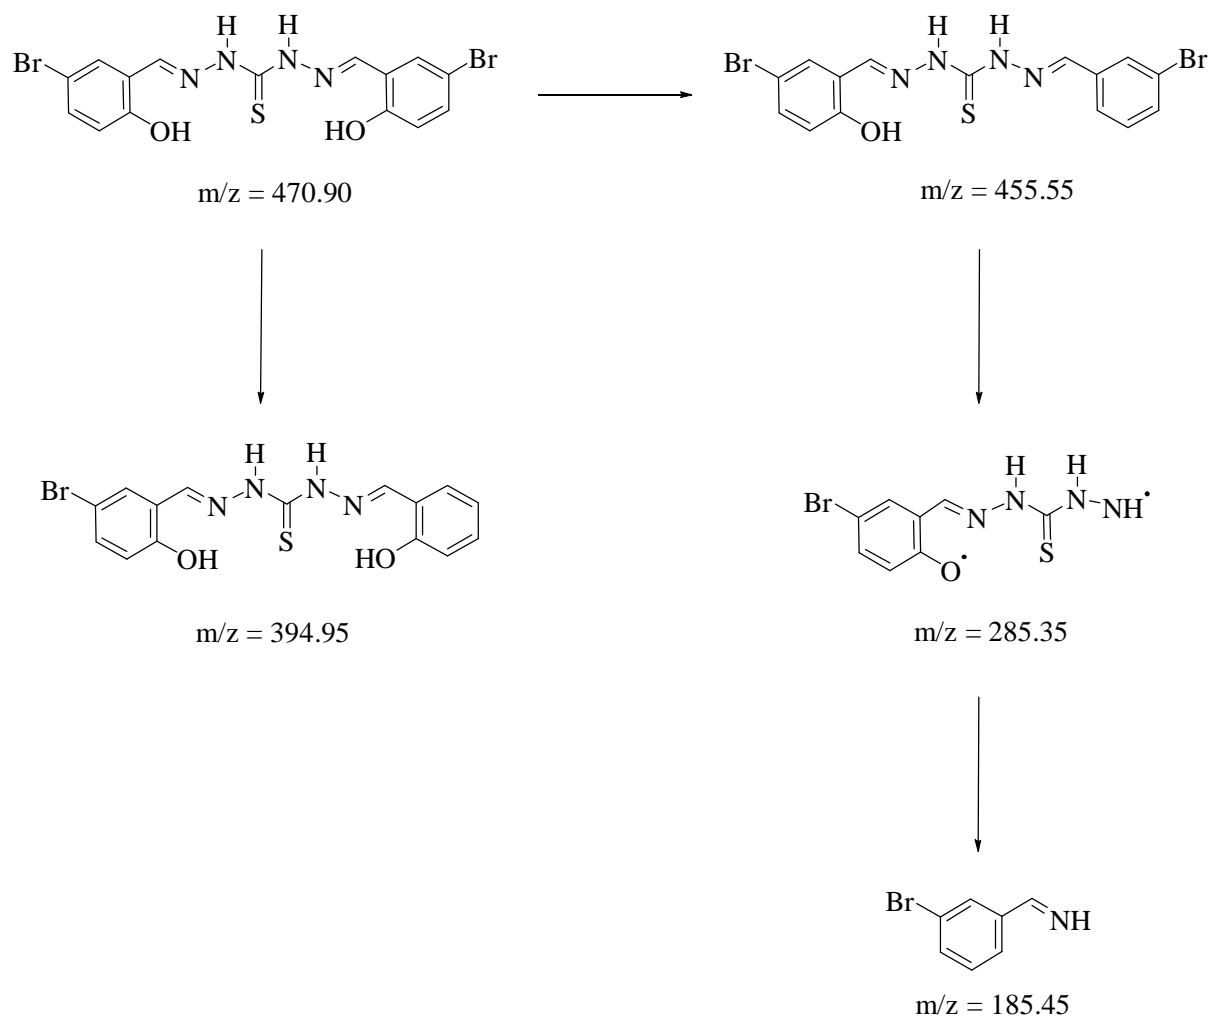

**Fig. S10** Mass fragmentation pattern of the chemosensor R2.

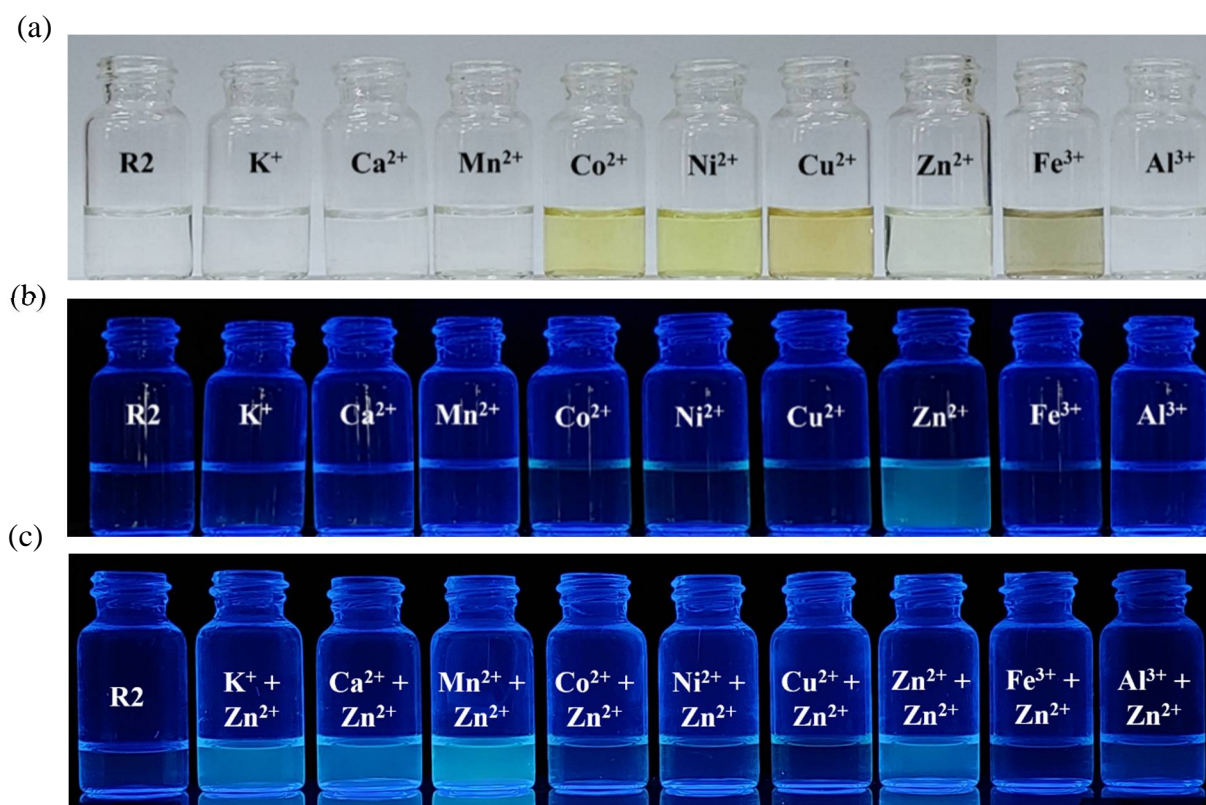

**Fig. S11** Visual responses of R2 upon addition of different metal ions under ambient (a) and UV light (b) conditions, and towards  $\text{Zn}^{2+}$  cation in the presence of various competing metal ions under UV light condition (c), in  $\text{CH}_3\text{CN}:\text{DMSO}$  (v/v 9:1).

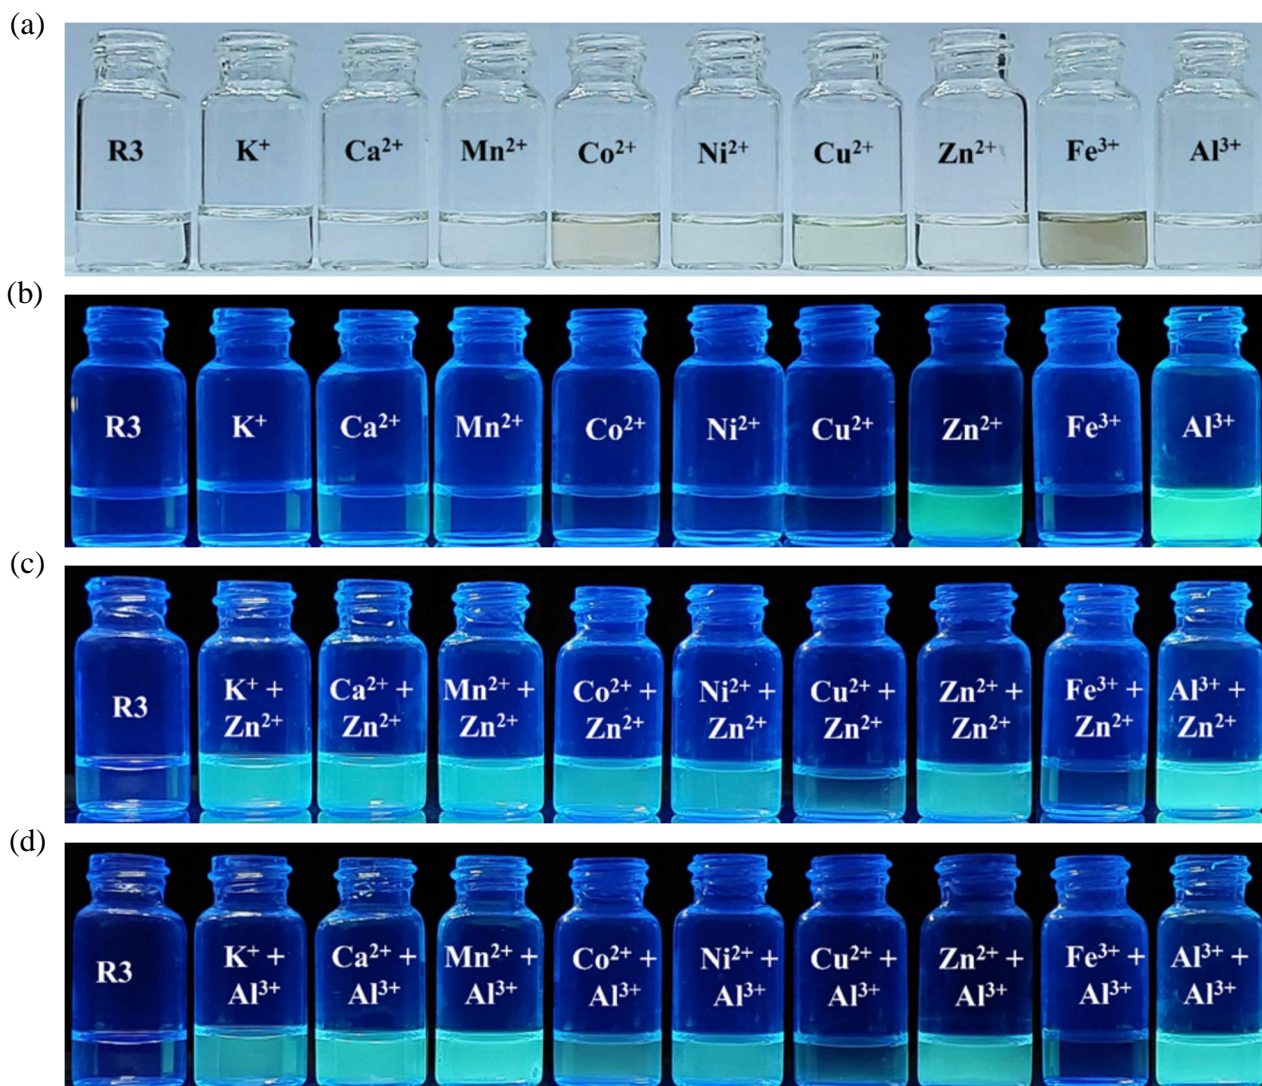

**Fig. S12** Visual responses of R3 upon addition of different metal ions under ambient (a) and UV light (b) conditions, and towards  $Zn^{2+}$  (c) and  $Al^{3+}$  (d) cations in the presence of various competing metal ions under UV light condition, in  $CH_3CN:DMSO$  (v/v 9:1).

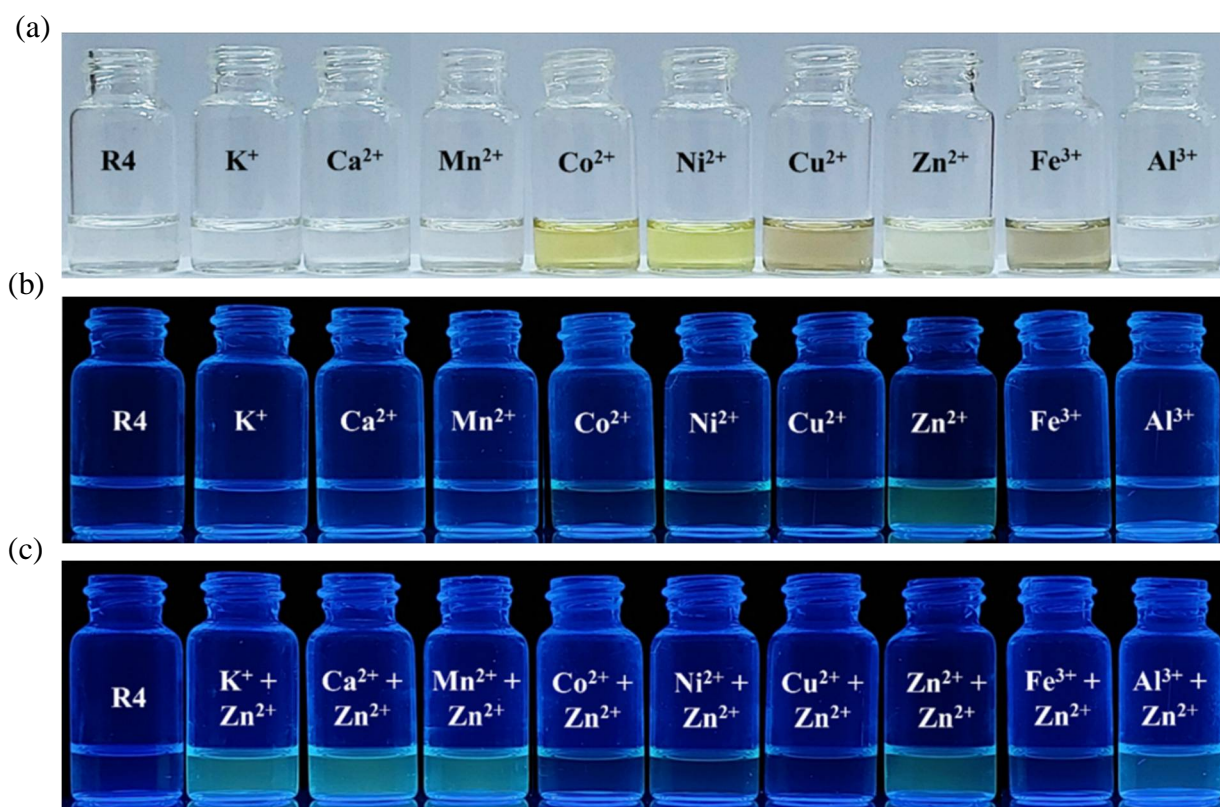

**Fig. S13** Visual responses of R4 upon addition of different metal ions under ambient (a) and UV light (b) conditions, and towards  $\text{Zn}^{2+}$  cation in the presence of various competing metal ions under UV light condition (c), in  $\text{CH}_3\text{CN}:\text{DMSO}$  (v/v 9:1).



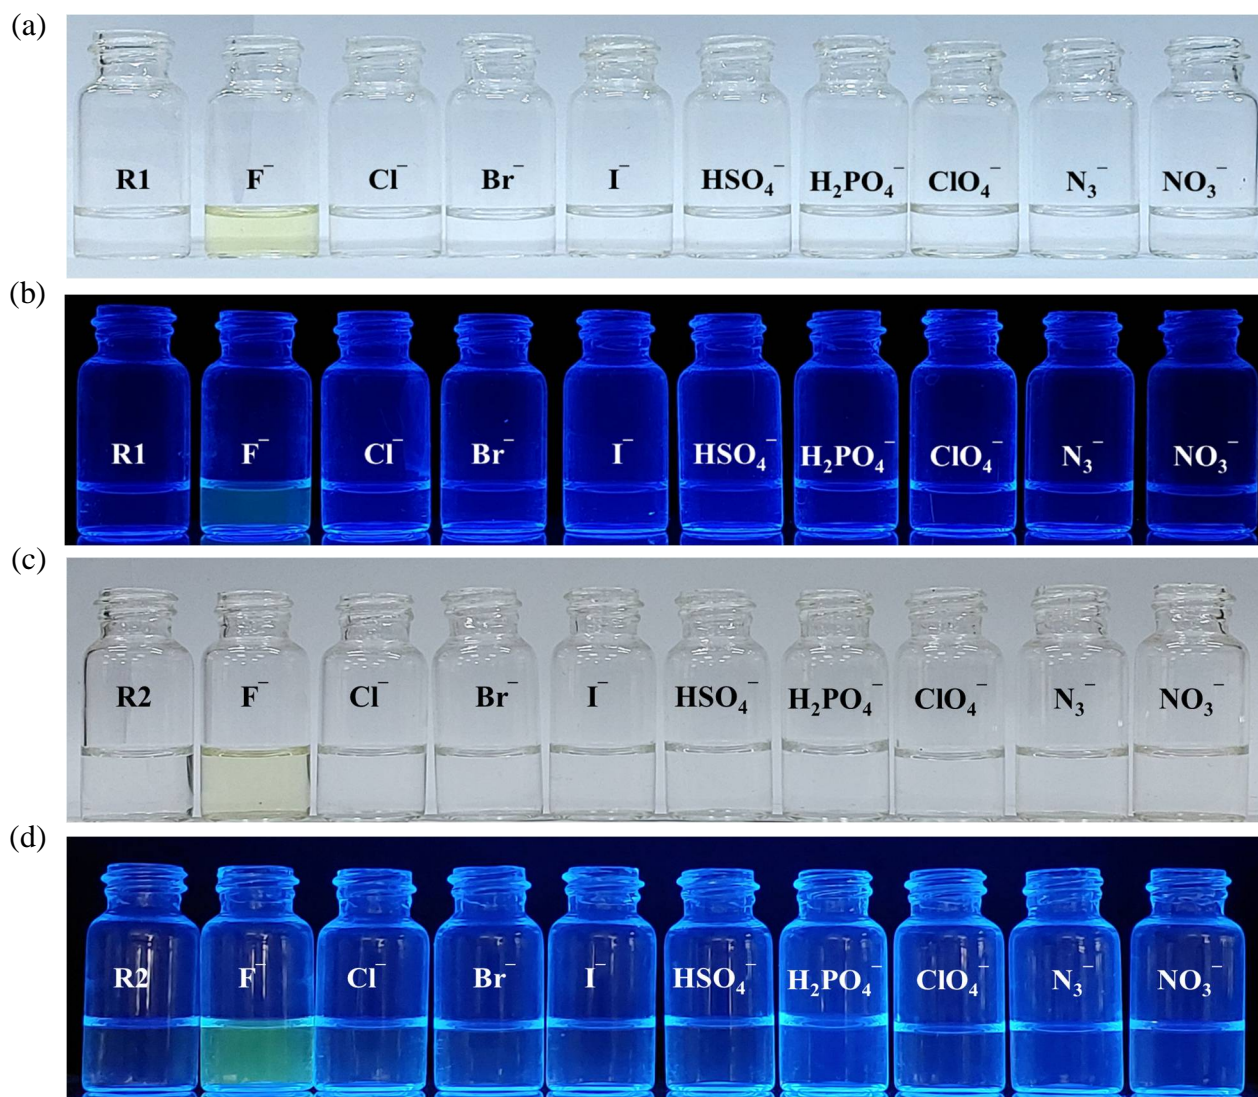

**Fig. S14** Visual responses of R1 upon addition of different anions under ambient (a) and UV light (b) conditions, and R2 upon addition of different anions under ambient (c) and UV light (d) conditions, in CH<sub>3</sub>CN:DMSO (v/v 9:1).

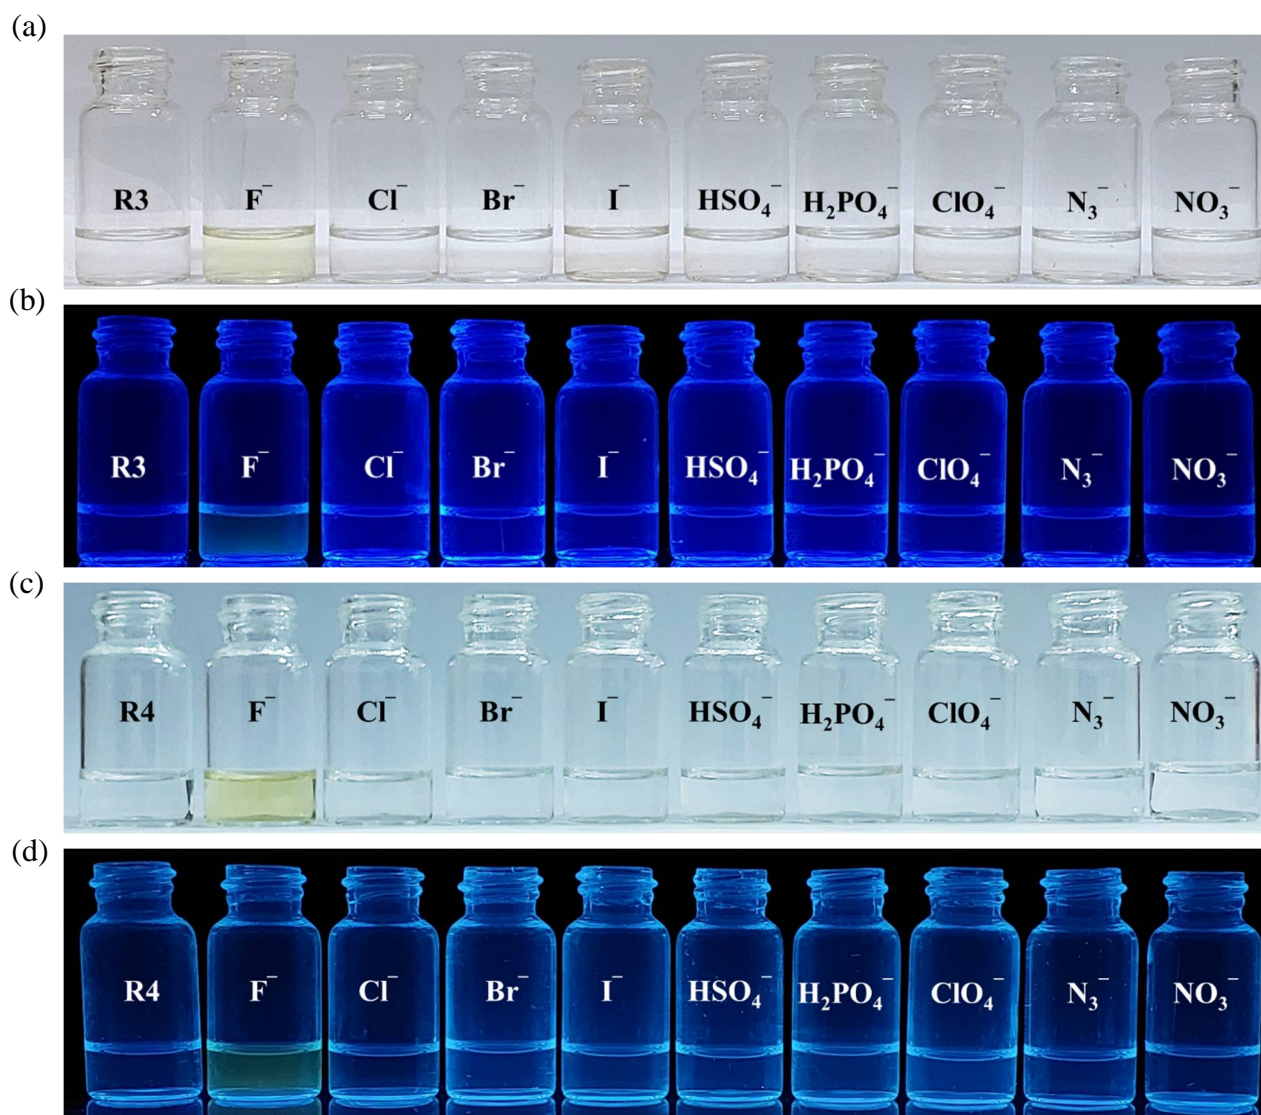

**Fig. S15** Visual responses of R3 upon addition of different anions under ambient (a) and UV light (b) conditions, and R4 upon addition of different anions under ambient (c) and UV light (d) conditions, in  $\text{CH}_3\text{CN}:\text{DMSO}$  (v/v 9:1).

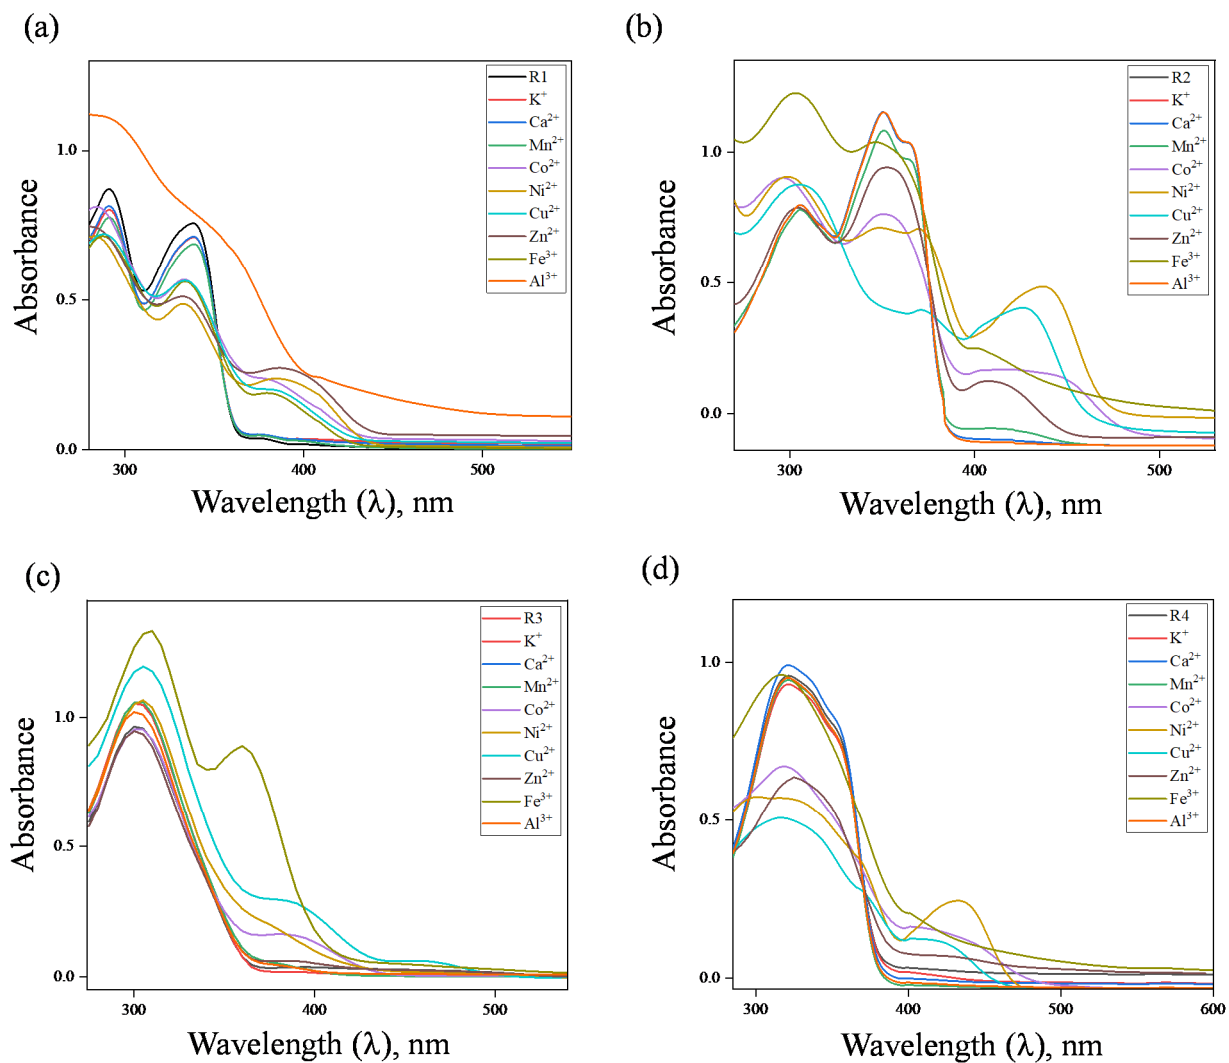

**Fig. S16** Absorbance spectral changes of R1 (a), R2 (b), R3 (c) and R4 (d) upon addition of 5  $\mu$ L of different cations in  $CH_3CN:DMSO$  (v/v 9:1).

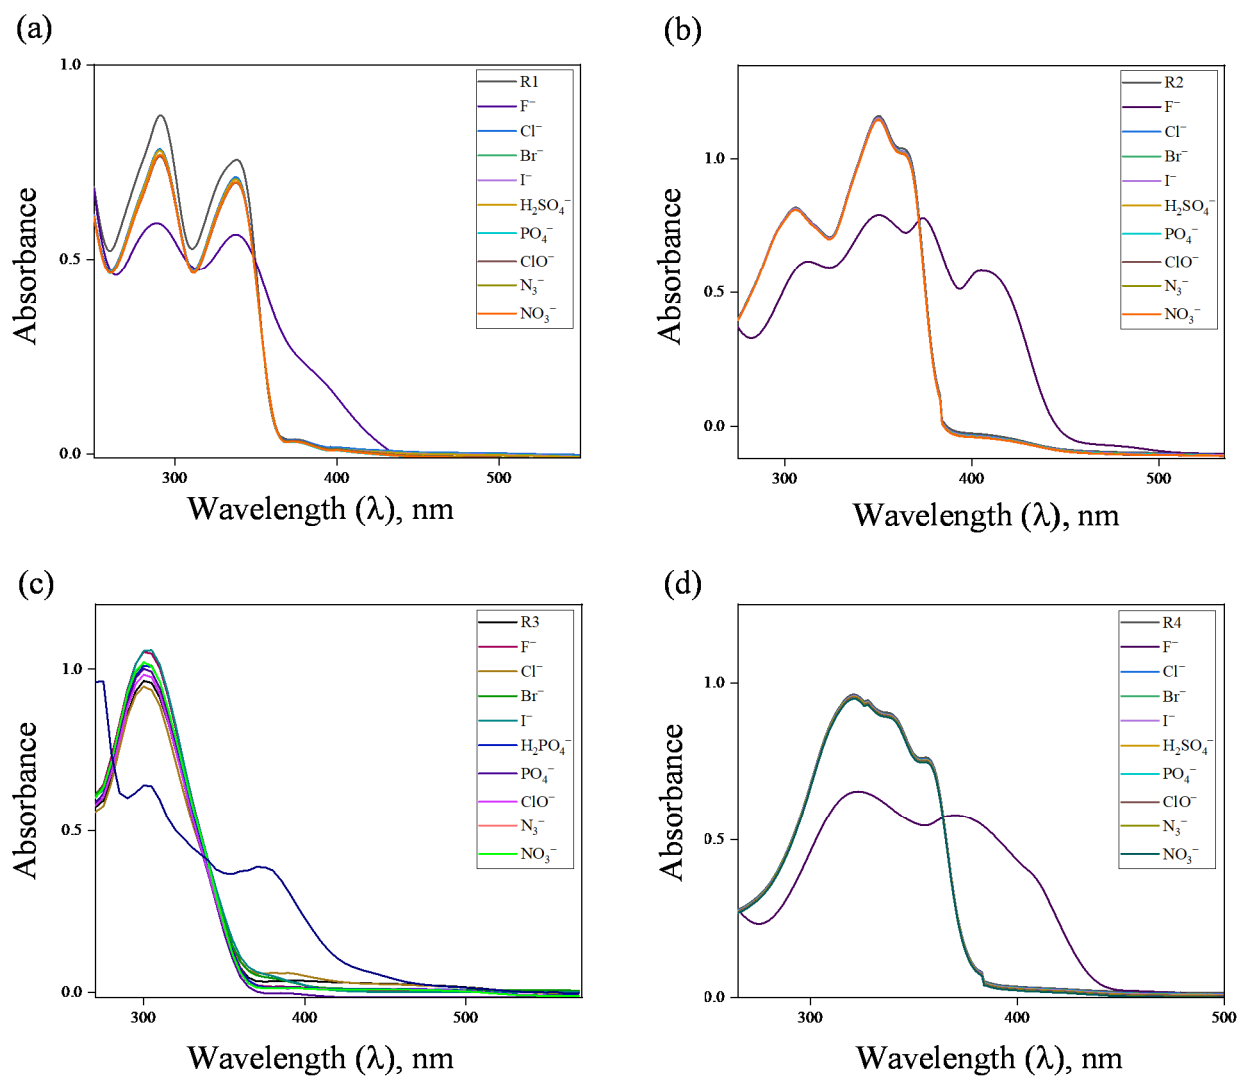

**Fig. S17** Absorbance spectral changes of R1 (a), R2 (b), R3 (c) and R4 (d) upon addition of 5  $\mu$ L of different anions in  $CH_3CN:DMSO$  (v/v 9:1).



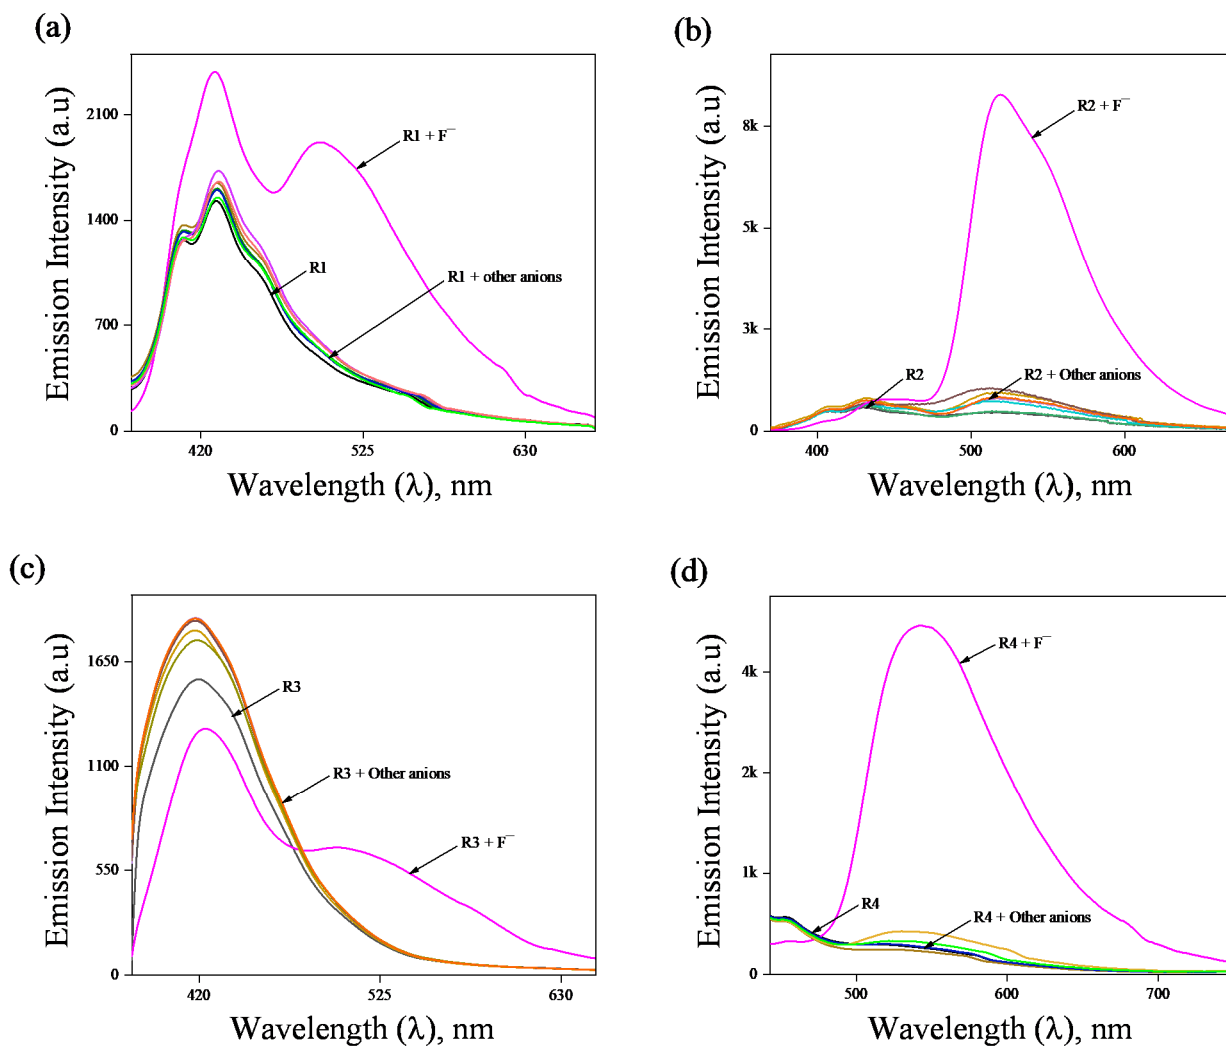

**Fig. S18** Fluorescence spectral changes of R1 (a), R2 (b), R3 (c) and R4 (d) upon addition of 5  $\mu$ L of different anions in CH<sub>3</sub>CN:DMSO (v/v 9:1).

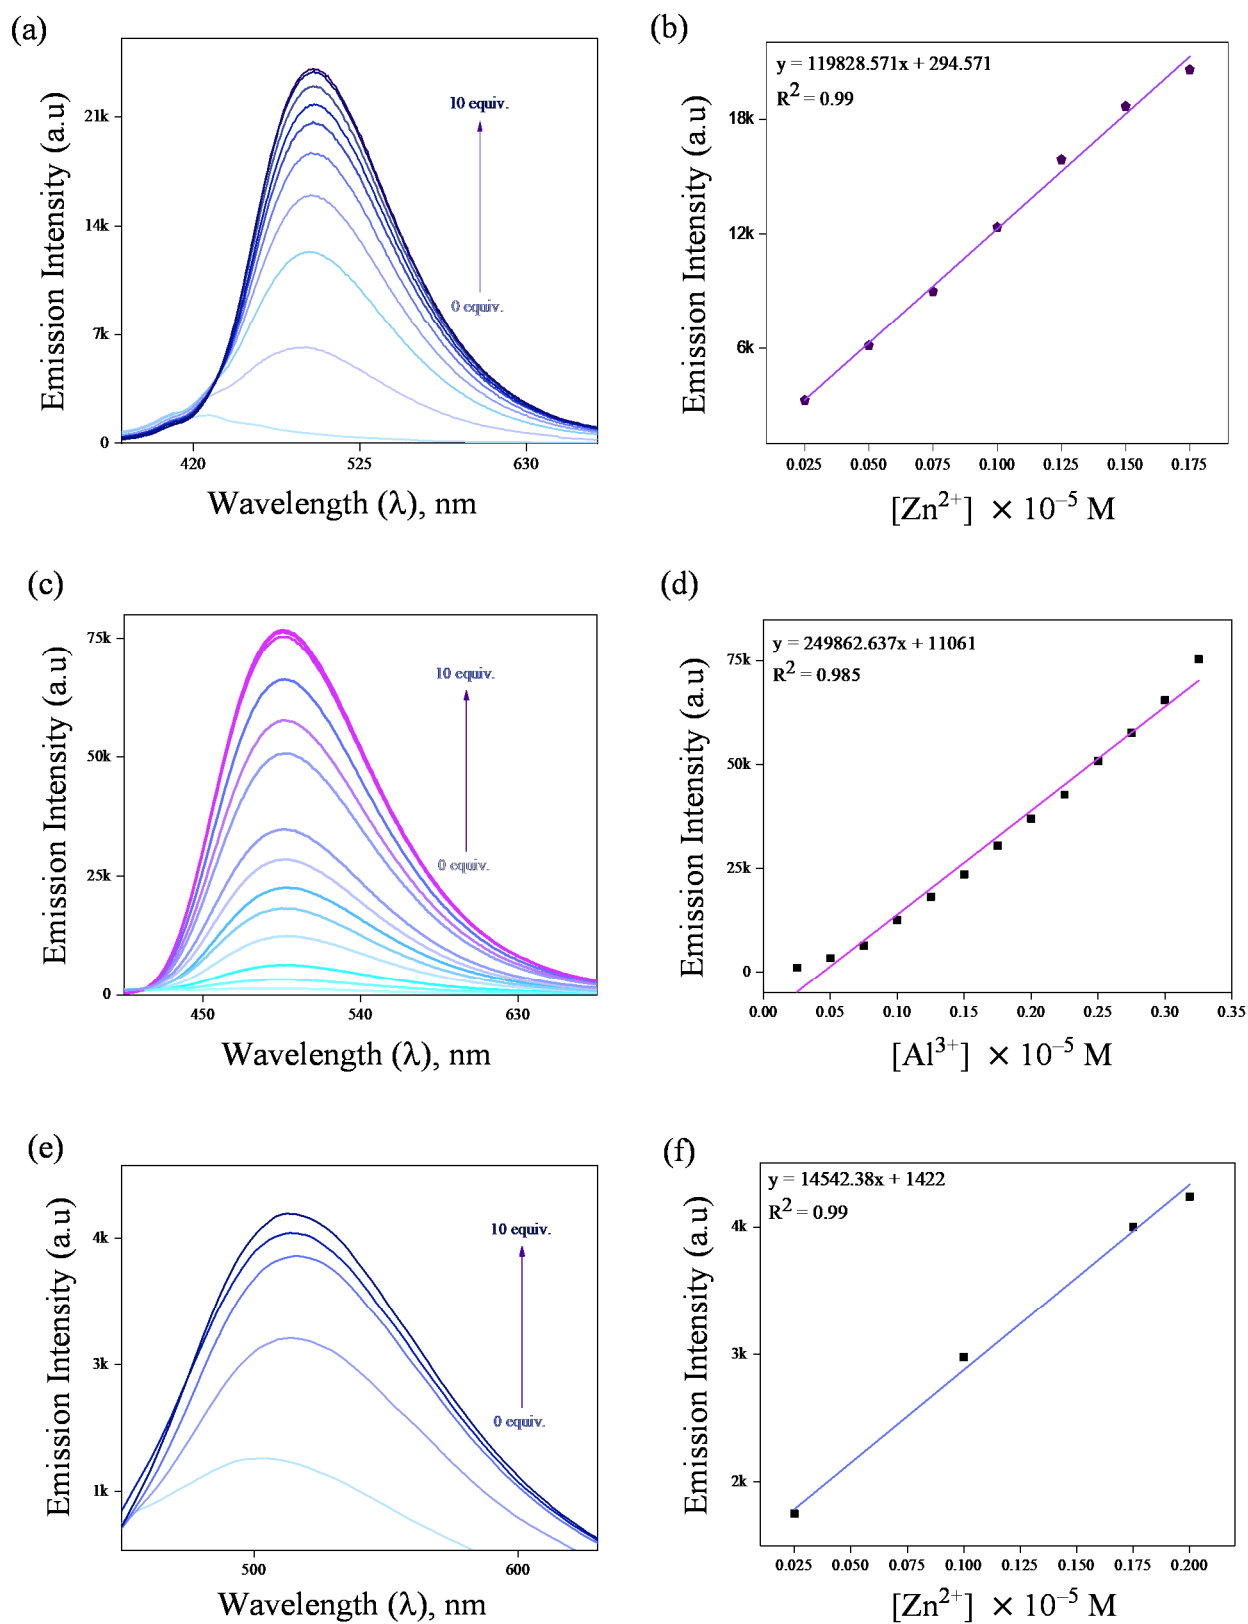

**Fig. S19** Fluorescence spectral titrations of the chemosensor R3 on incremental addition of  $\text{Zn}^{2+}$  (a) and  $\text{Al}^{3+}$  (c) cations, and their corresponding calibration plots (b and d), and R4 on incremental addition of  $\text{Zn}^{2+}$  cation (e) and its corresponding calibration plot (f).

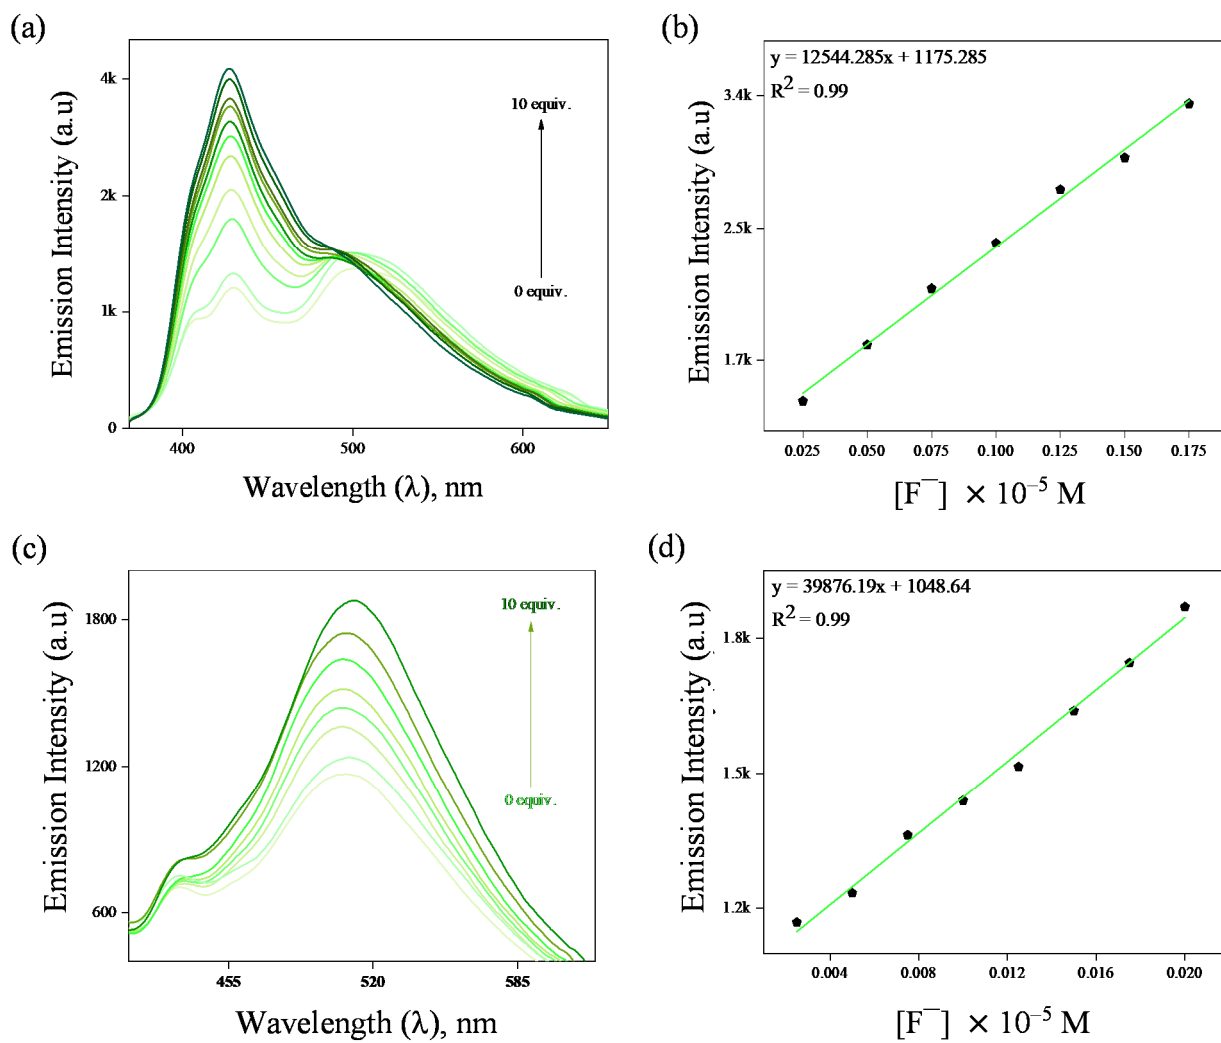

**Fig. S20** Fluorescence spectral titrations of the chemosensors R1 (a) and R2 (c) on incremental addition of  $F^-$  anion, and their corresponding calibration plots (b and d).

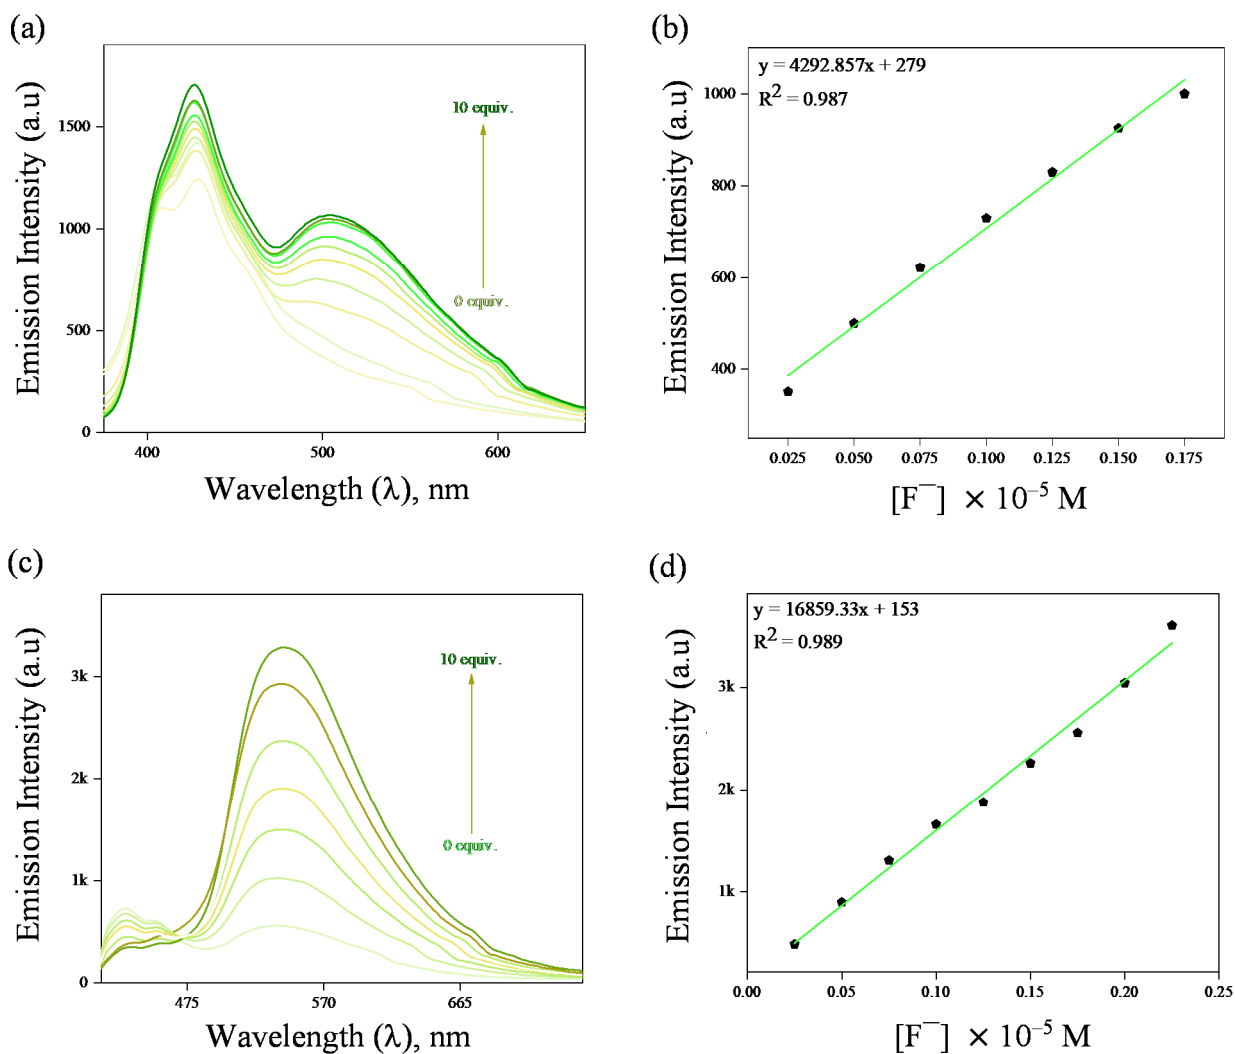

**Fig. S21** Fluorescence spectral titrations of the chemosensors R3 (a) and R4 (c) on incremental addition of  $F^-$  anion and their corresponding calibration plots (b and d).

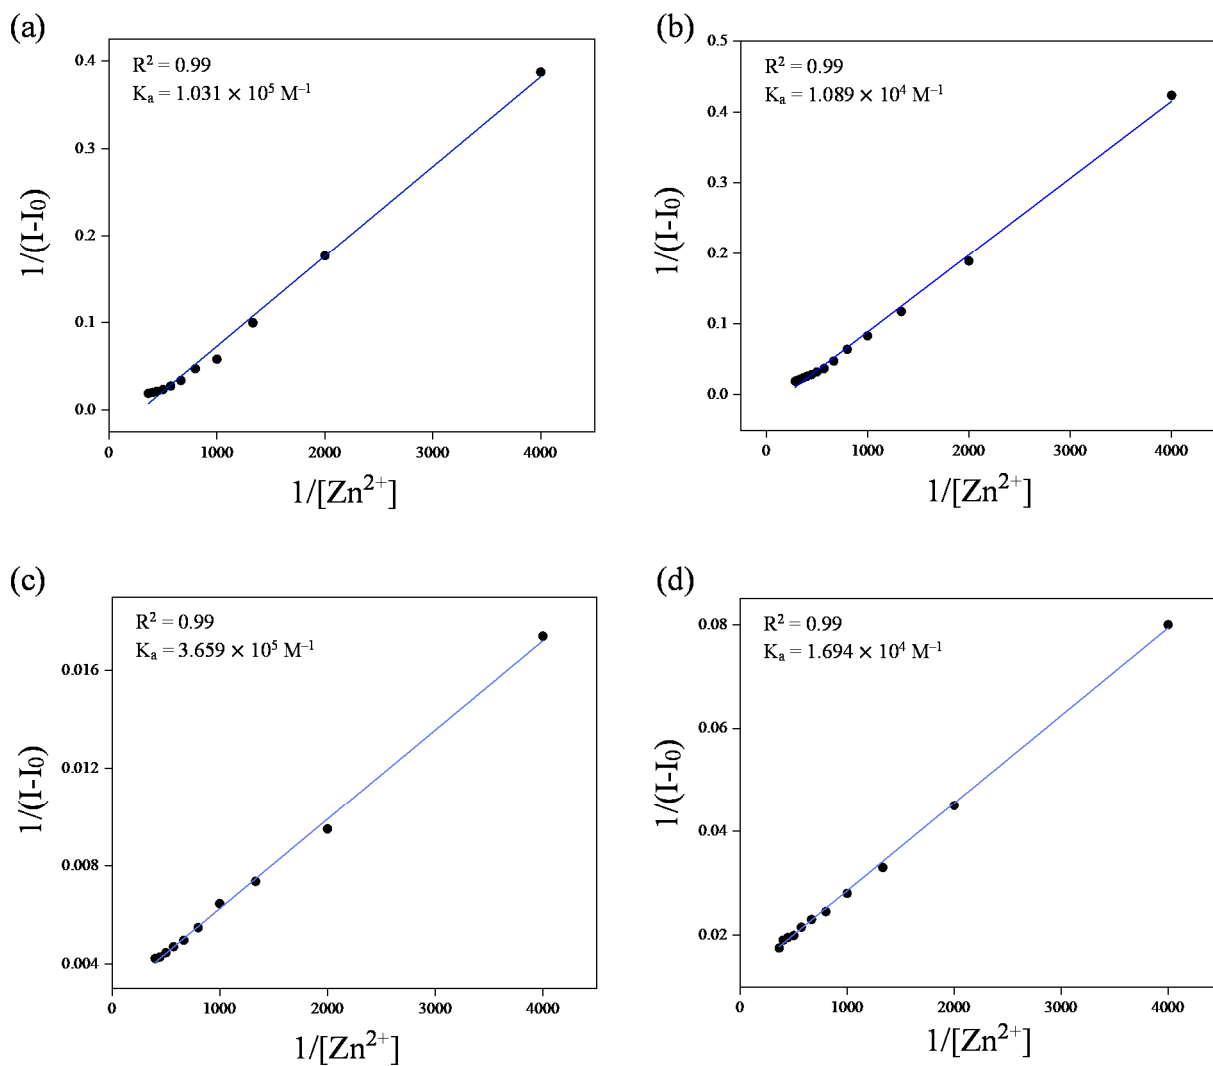

**Fig. S22** Benesi-Hildebrand plots of the chemosensors R1 (a), R2 (b), R3 (c) and R4 (d) with  $Zn^{2+}$  cation for the calculation of association constant from fluorescence spectral titration studies.

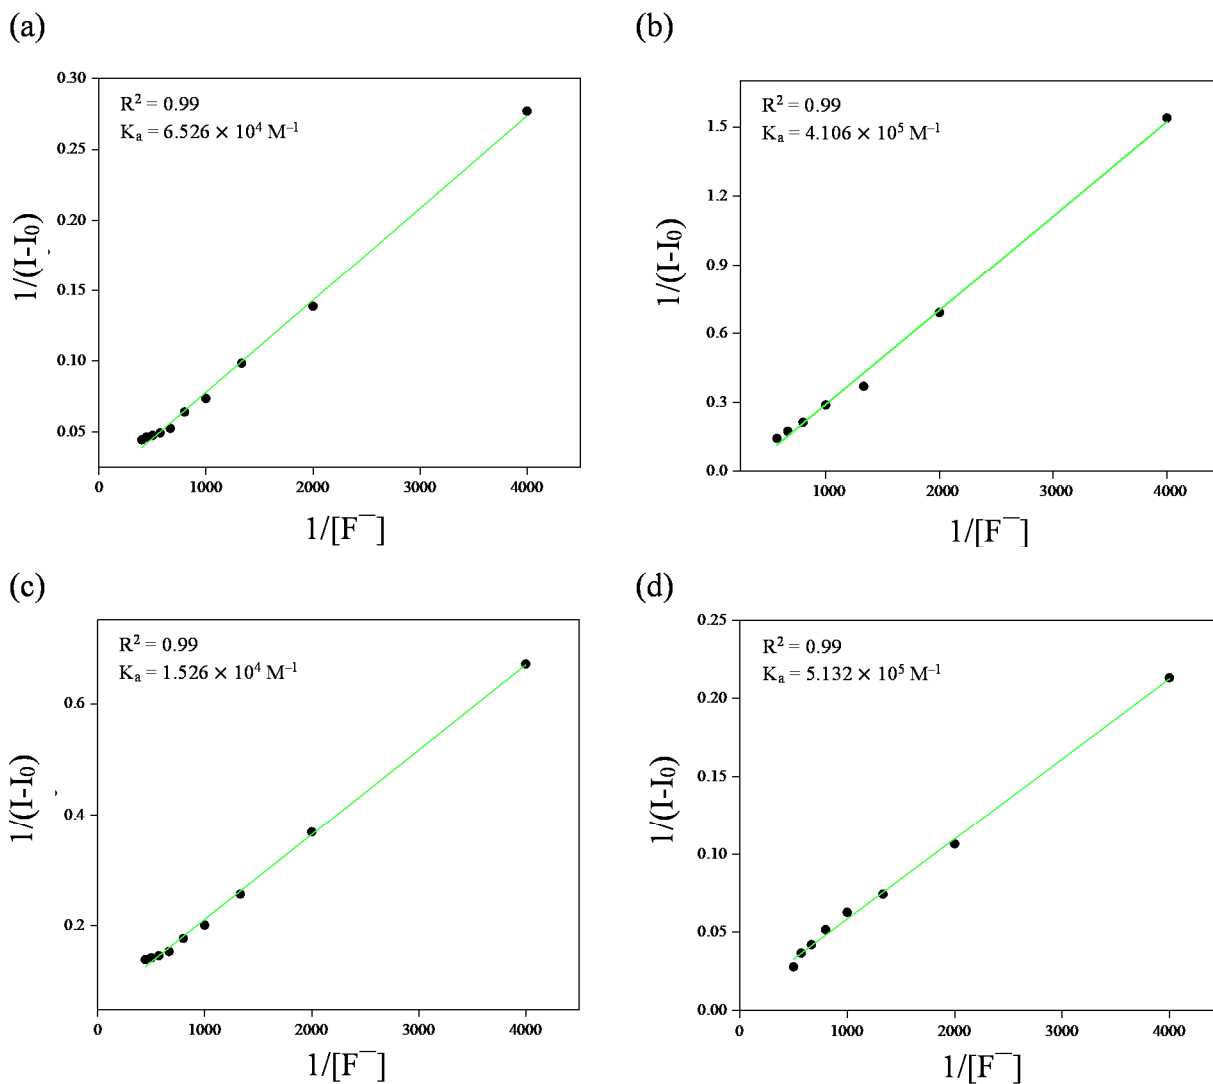

**Fig. S23** Benesi-Hildebrand plots of the chemosensors R1 (a), R2 (b), R3 (c) and R4 (d) with  $F^-$  anion for the calculation of association constant from fluorescence spectral titration studies.

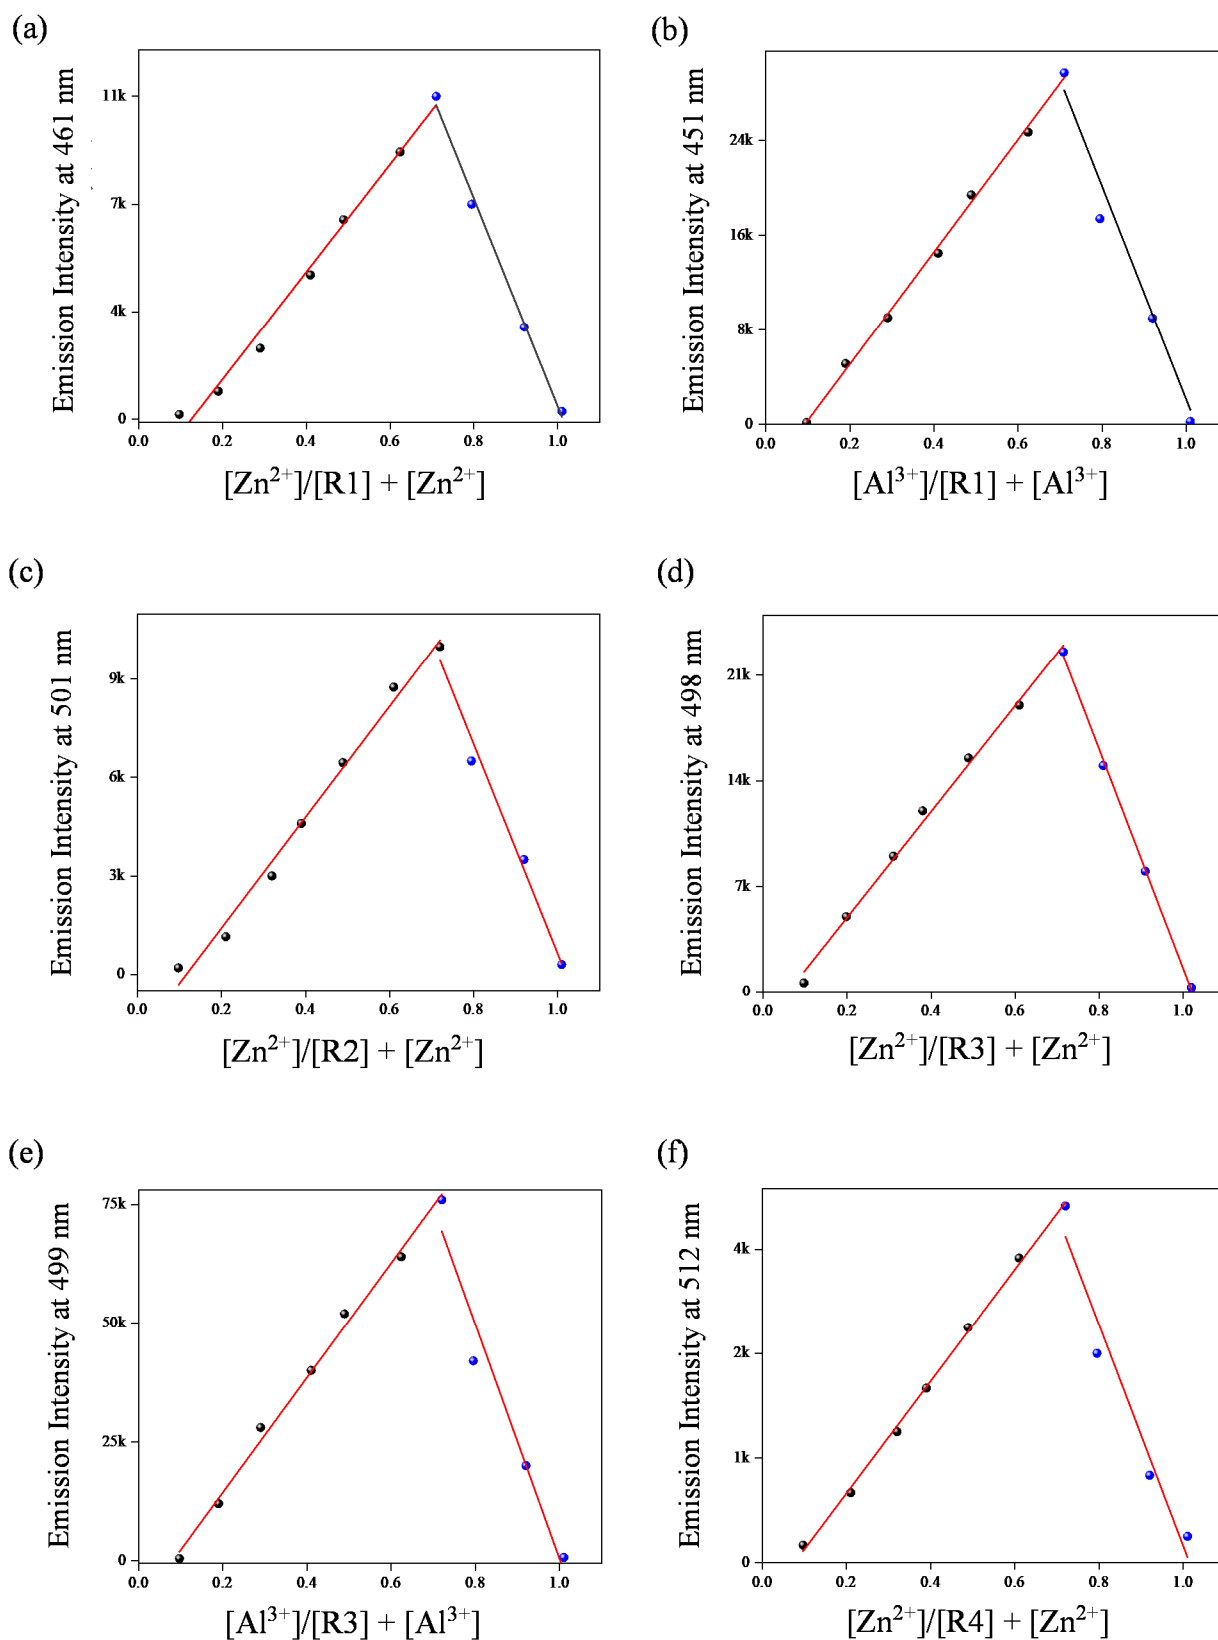

**Fig. S24** Job's plot analysis of the chemosensors (R1–R4) upon complexing with  $Zn^{2+}$  and  $Al^{3+}$  cations: R1 +  $Zn^{2+}$  (a), R1 +  $Al^{3+}$  (b), R2 +  $Zn^{2+}$  (c), R3 +  $Zn^{2+}$ , (d) R3 +  $Al^{3+}$  (e) and R4 +  $Zn^{2+}$  (f).

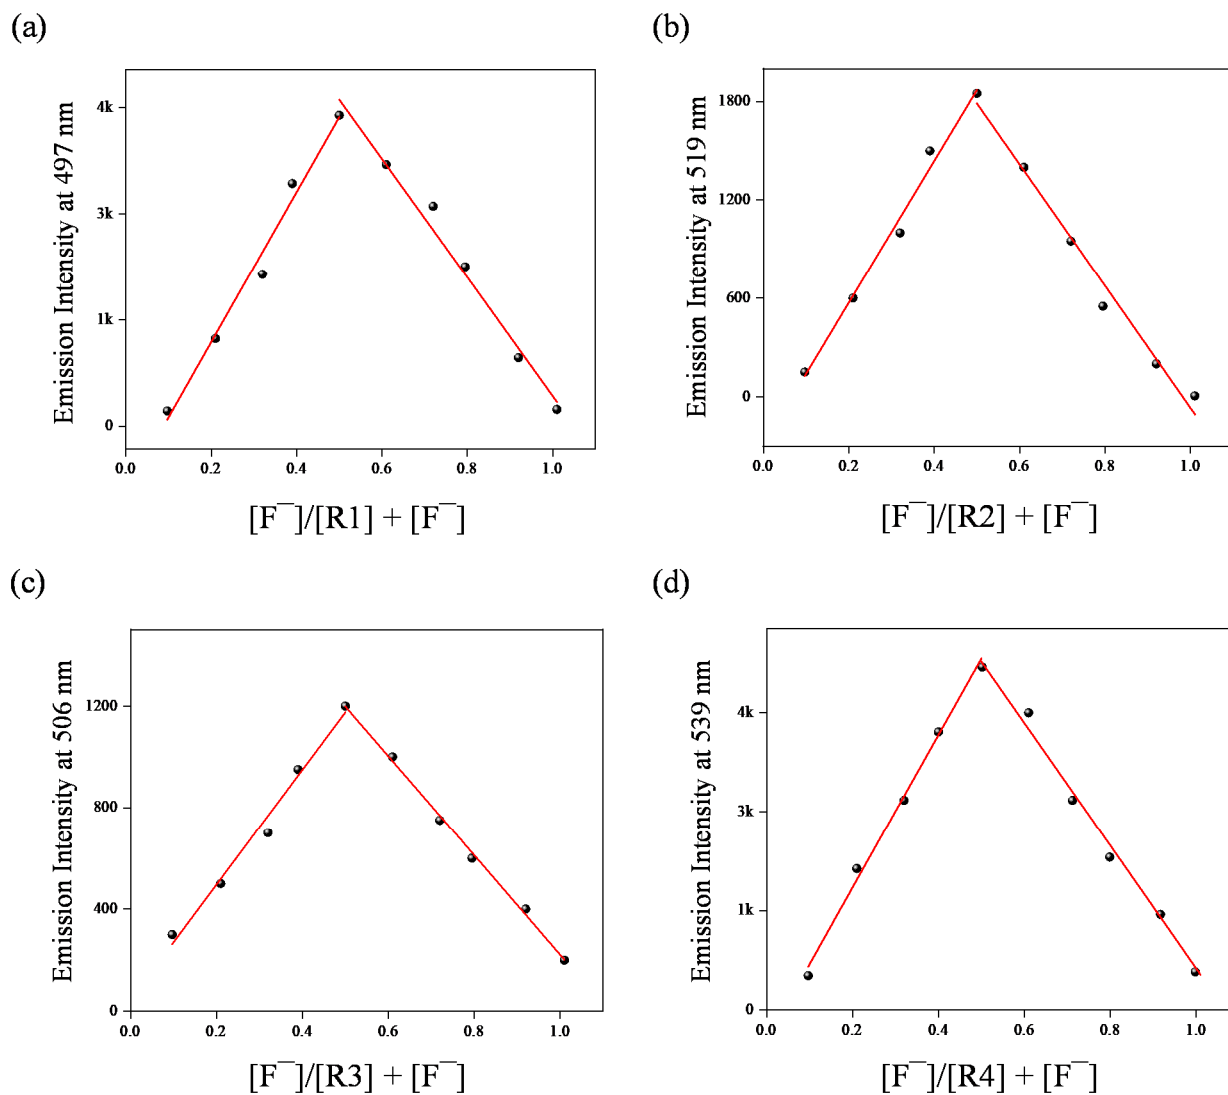

**Fig. S25** Job's plot analysis of the chemosensors (R1–R4) upon complexing with F<sup>-</sup> anion: R1 + F<sup>-</sup> (a), R2 + F<sup>-</sup> (b), R3 + F<sup>-</sup> (c) and R4 + F<sup>-</sup> (d).



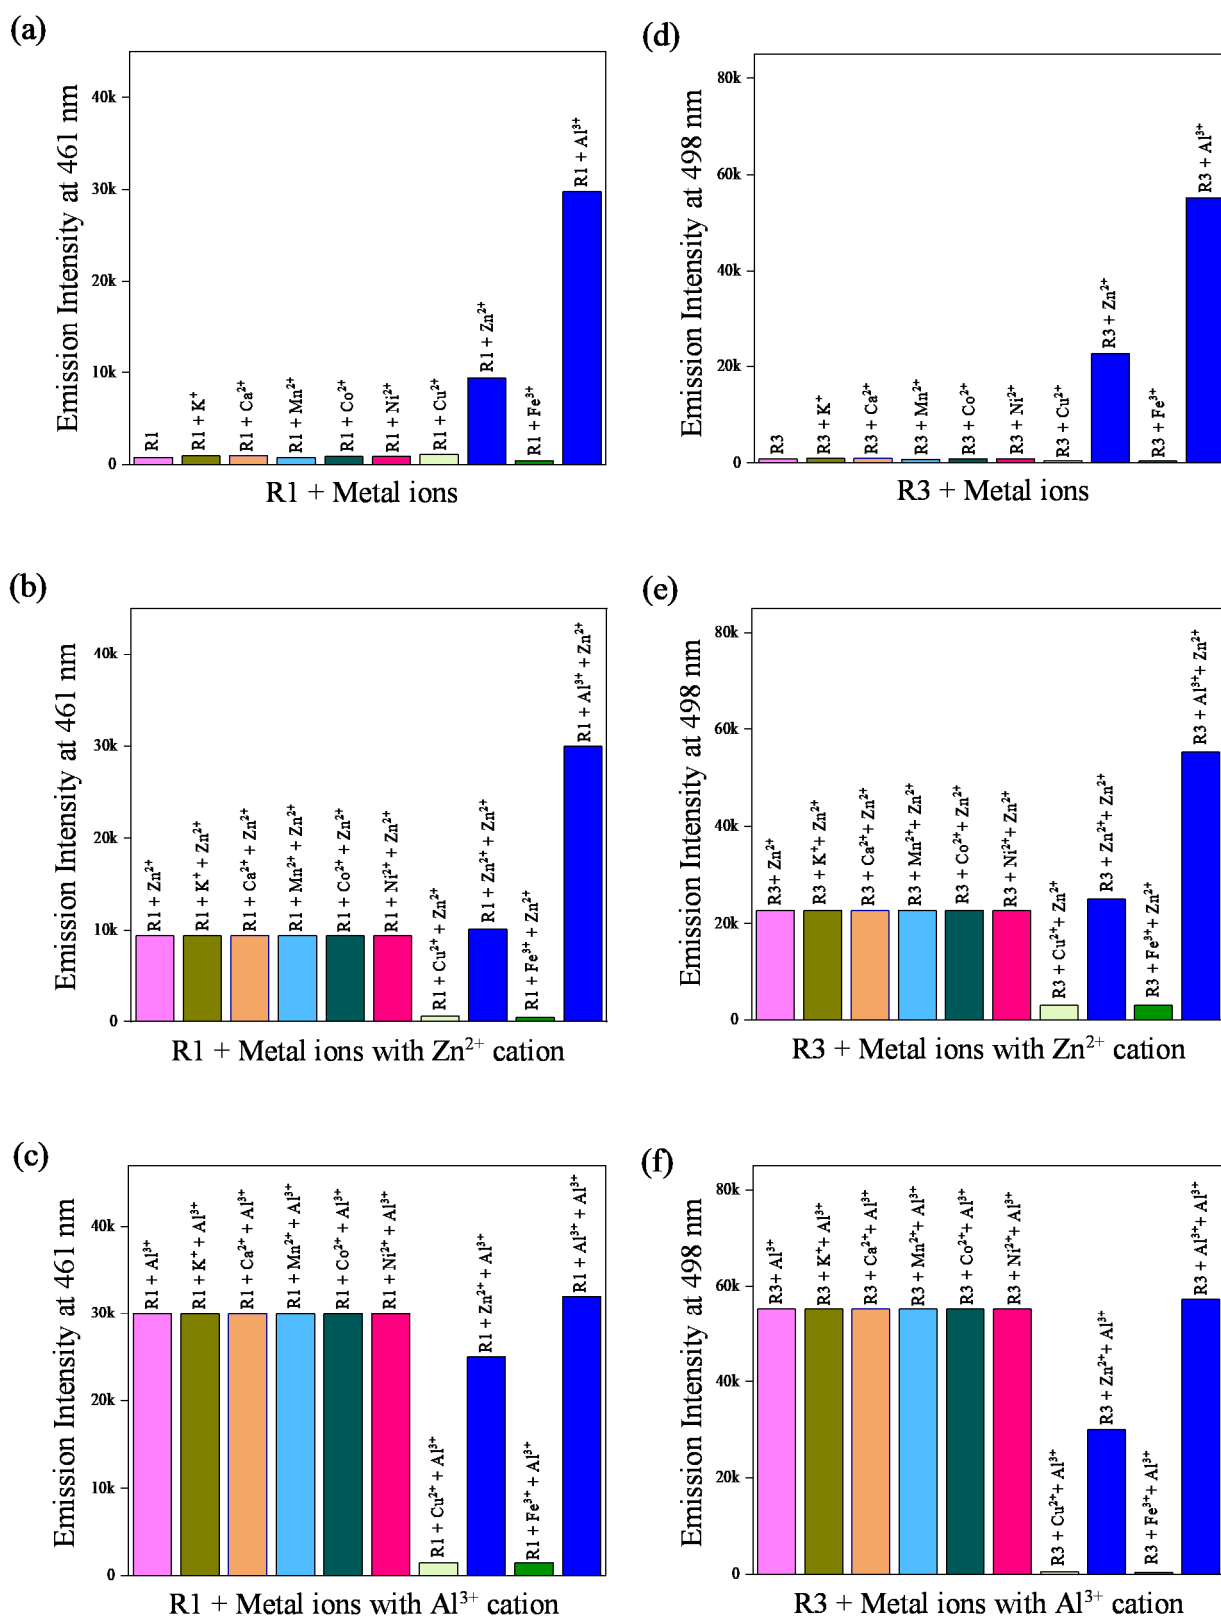

**Fig. S26** Relative emission intensity as bar graph showing metal competition analysis of the chemosensors R1 and R3 with 10 equiv. of Zn<sup>2+</sup> and Al<sup>3+</sup> cations: R1 + Metal ions (a), R1 + Competing metal ions + Zn<sup>2+</sup> (b), R1 + Competing metal ions + Al<sup>3+</sup> (c), R3 + Metal ions (d), R3 + Competing metal ions + Zn<sup>2+</sup> (e) and R3 + Competing metal ions + Al<sup>3+</sup> (f), in CH<sub>3</sub>CN:DMSO (v/v 9:1).

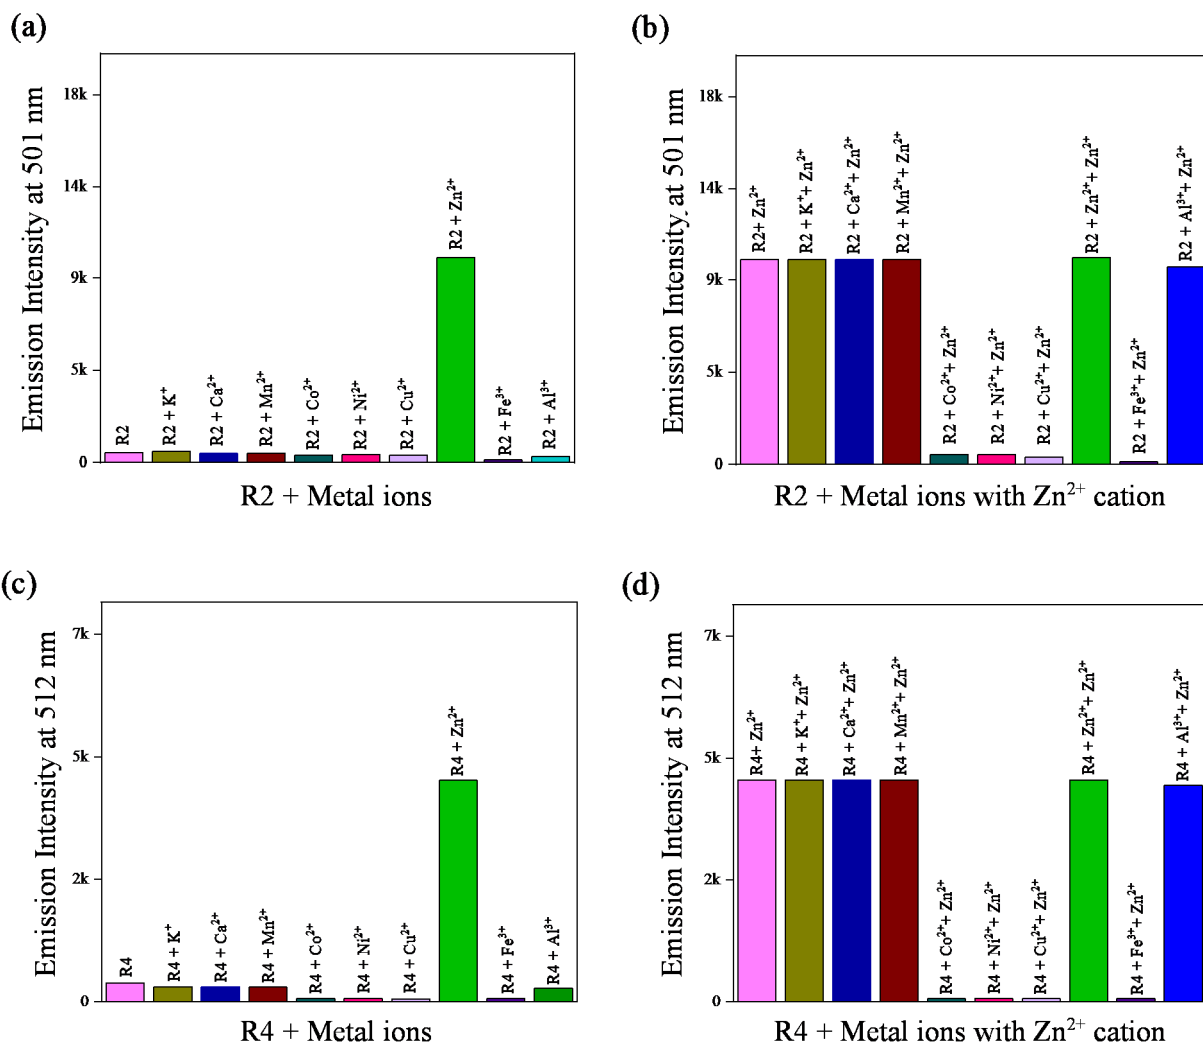

**Fig. S27** Relative emission intensity as bar graph showing metal competition analysis of the chemosensors R2 and R4 with 10 equiv. of Zn<sup>2+</sup> cations: R2 + Metal ions (a), R2 + Competing metal ions + Zn<sup>2+</sup> (b), R4 + Metal ions (c) and R4 + Competing metal ions + Zn<sup>2+</sup> (d), in CH<sub>3</sub>CN:DMSO (v/v 9:1).

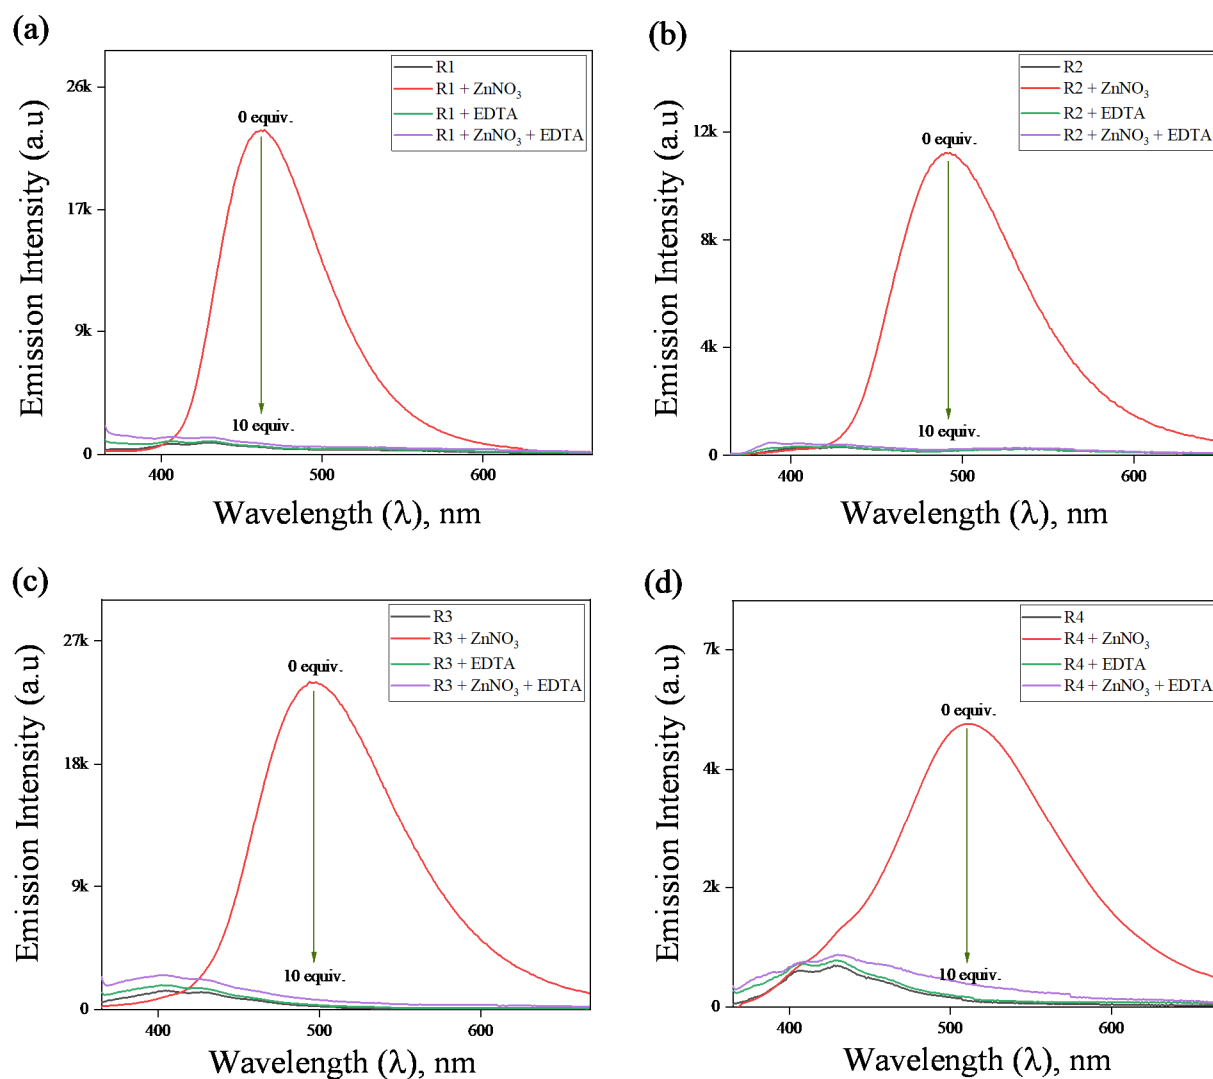

**Fig. S28** Fluorescence reversibility responses of the chemosensors R1 (a), R2 (b), R3 (c) and R4 (d) upon alternate addition of Zn<sup>2+</sup> and EDTA.

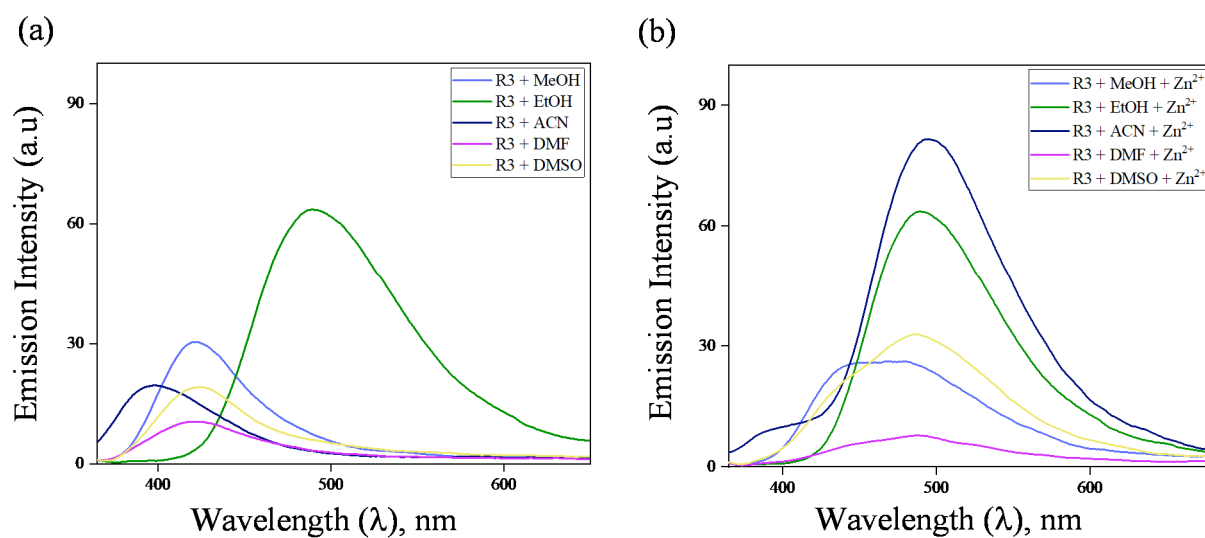

**Fig. S29** Fluorescence spectral changes of the chemosensor R3 (a) and R3 in presence of Zn<sup>2+</sup> cation (b), using different solvents.

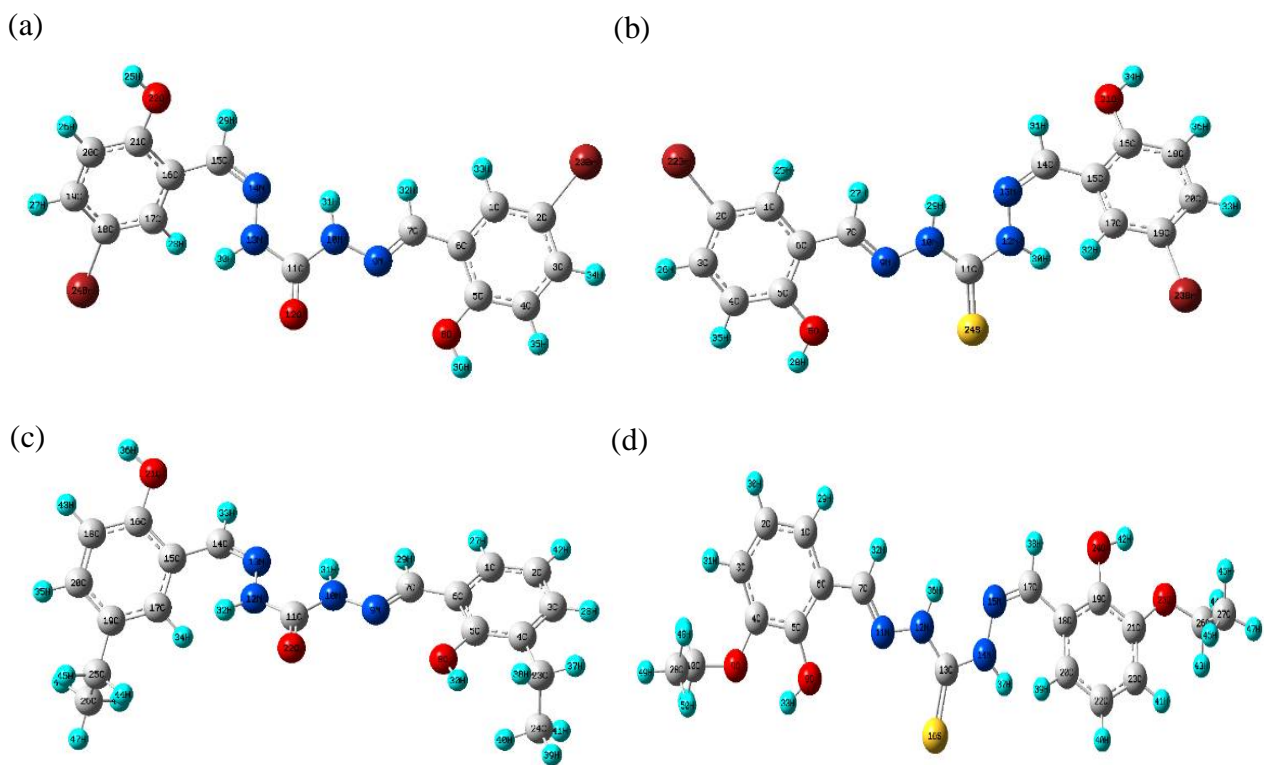

**Fig. S30** The optimized structures of the chemosensors R1 (a), R2 (b), R3 (c) and R4 (d).

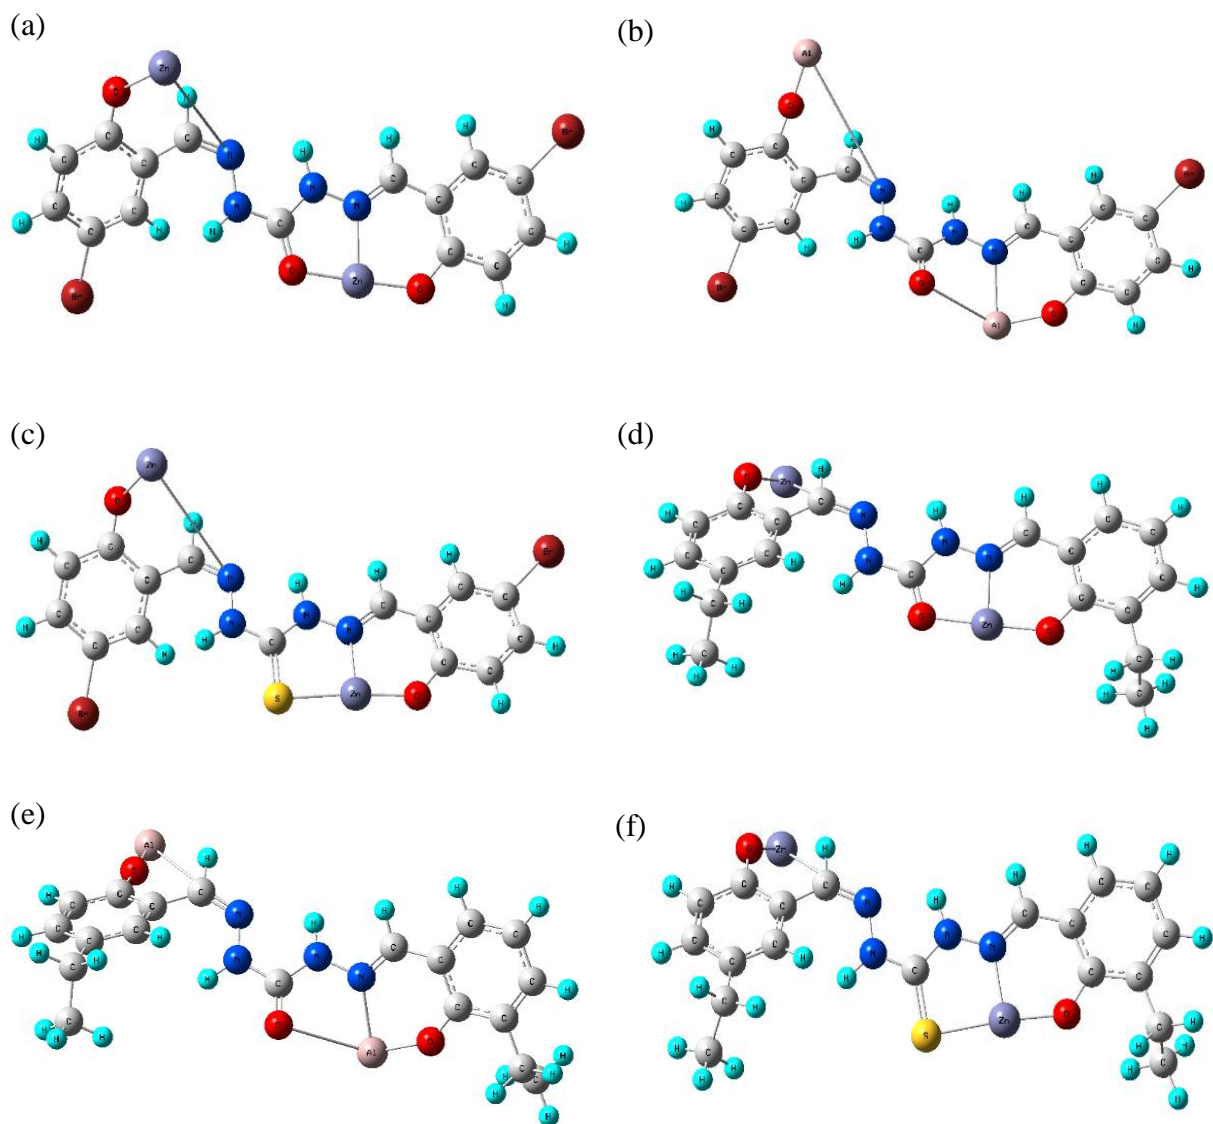

**Fig. S31** The optimized structures of the chemosensors (R1–R4) upon binding with Zn<sup>2+</sup> and Al<sup>3+</sup> cations: R1 + Zn<sup>2+</sup> (a), R1 + Al<sup>3+</sup> (b), R2 + Zn<sup>2+</sup> (c), R3 + Zn<sup>2+</sup> (d) R3 + Al<sup>3+</sup> (e) and R4 + Zn<sup>2+</sup> (f).

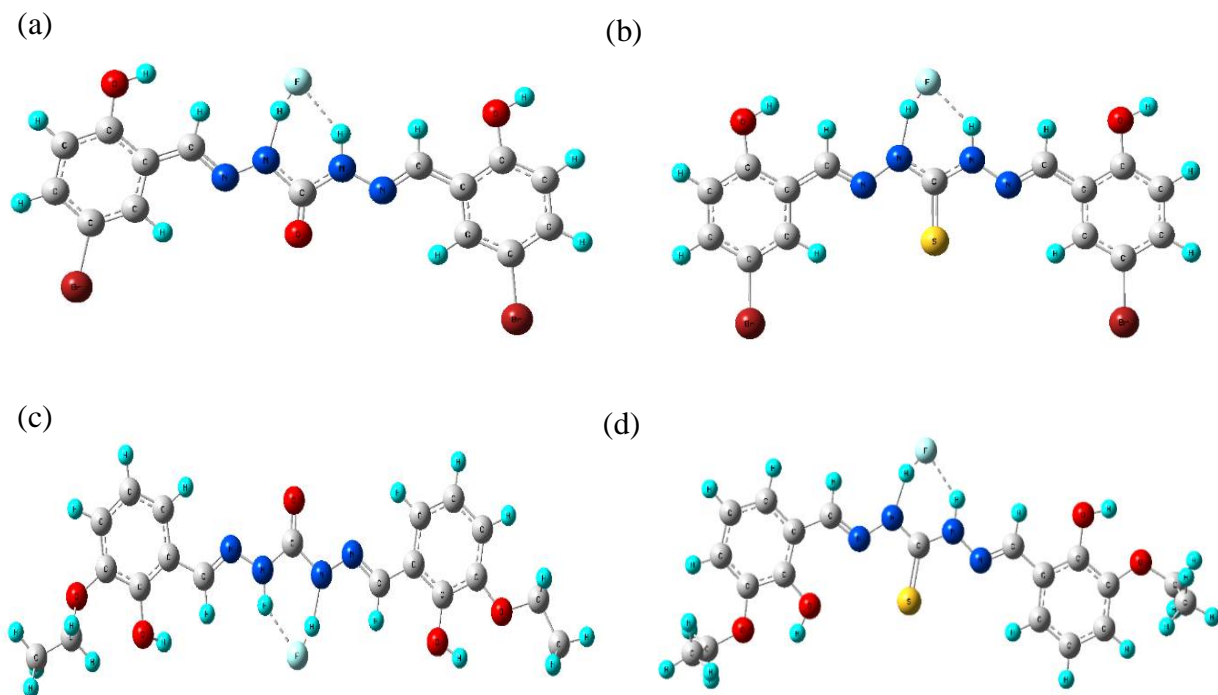

**Fig. S32** The optimized structures of the chemosensors (R1–R4) upon binding with  $F^-$  anion: R1 +  $F^-$  (a), R2 +  $F^-$  (b), R3 +  $F^-$  (c) and R4 +  $F^-$  (d).

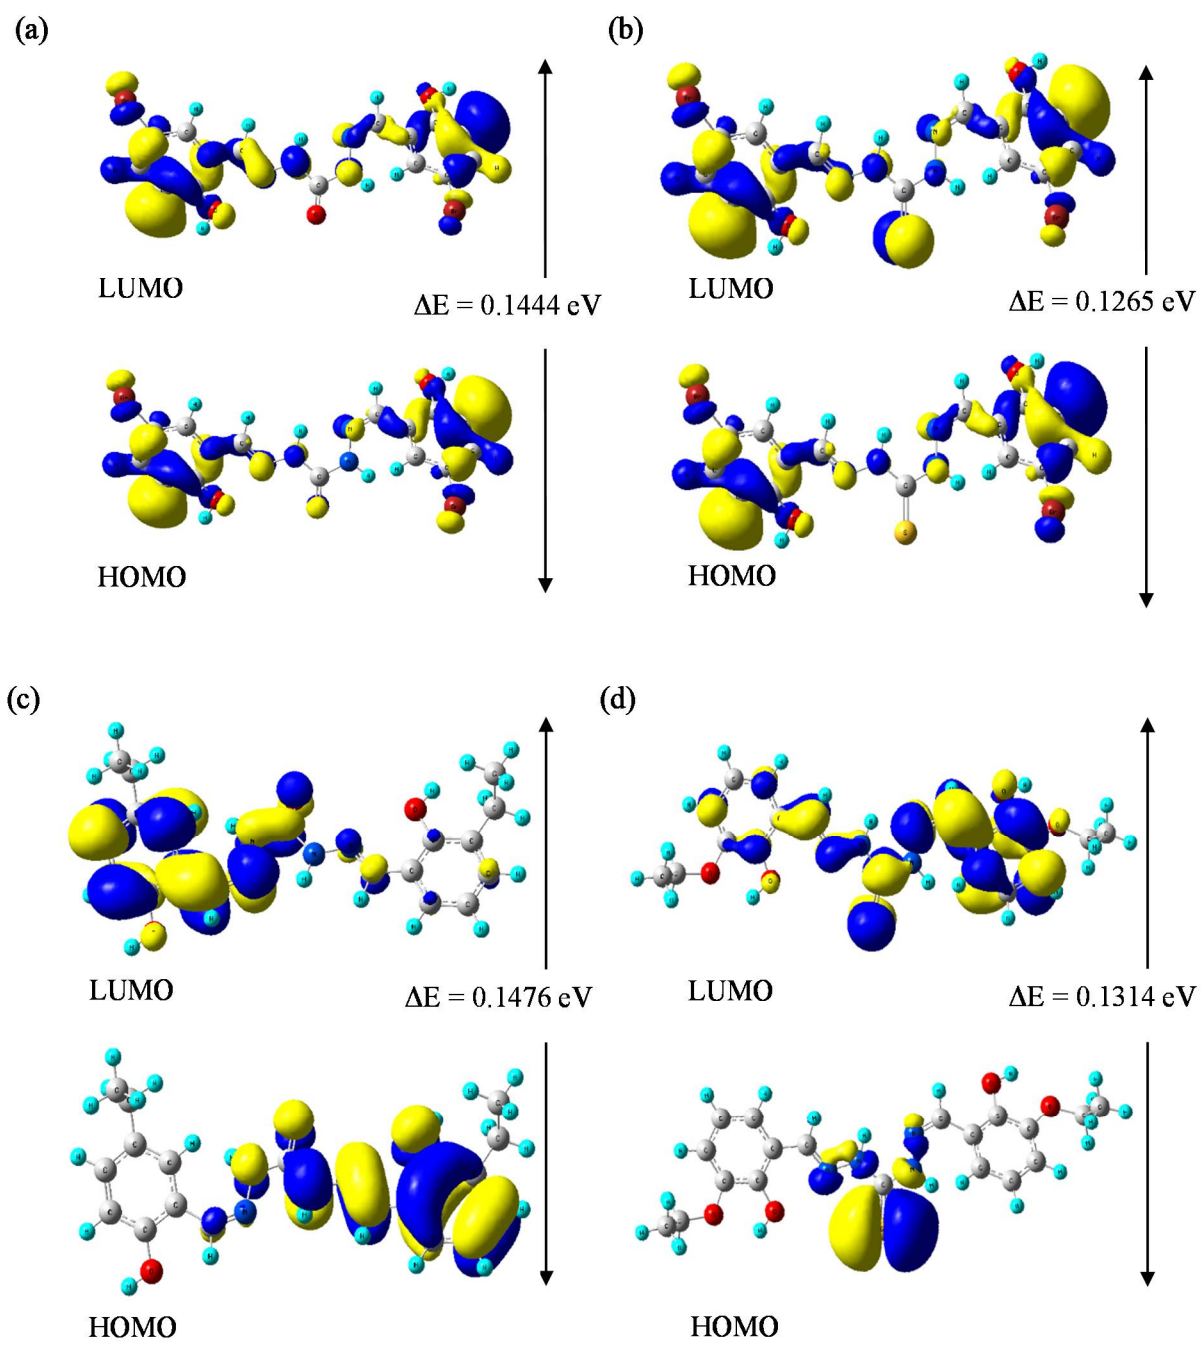

**Fig. S33** Frontier molecular orbitals of the chemosensors R1 (a), R2 (b), R3 (c) and R4 (d).

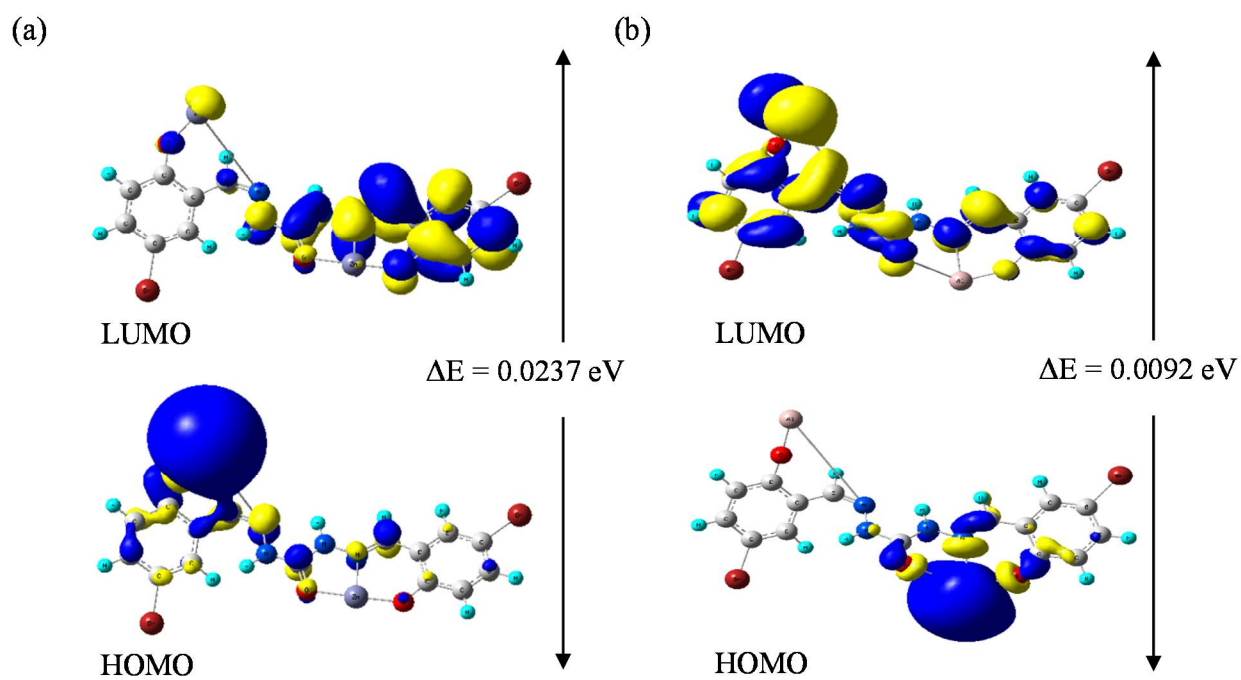

**Fig. S34** Frontier molecular orbitals of the chemosensor R1 upon binding with  $\text{Zn}^{2+}$  and  $\text{Al}^{3+}$  cations: R1 +  $\text{Zn}^{2+}$  (a) and R1 +  $\text{Al}^{3+}$  (b).



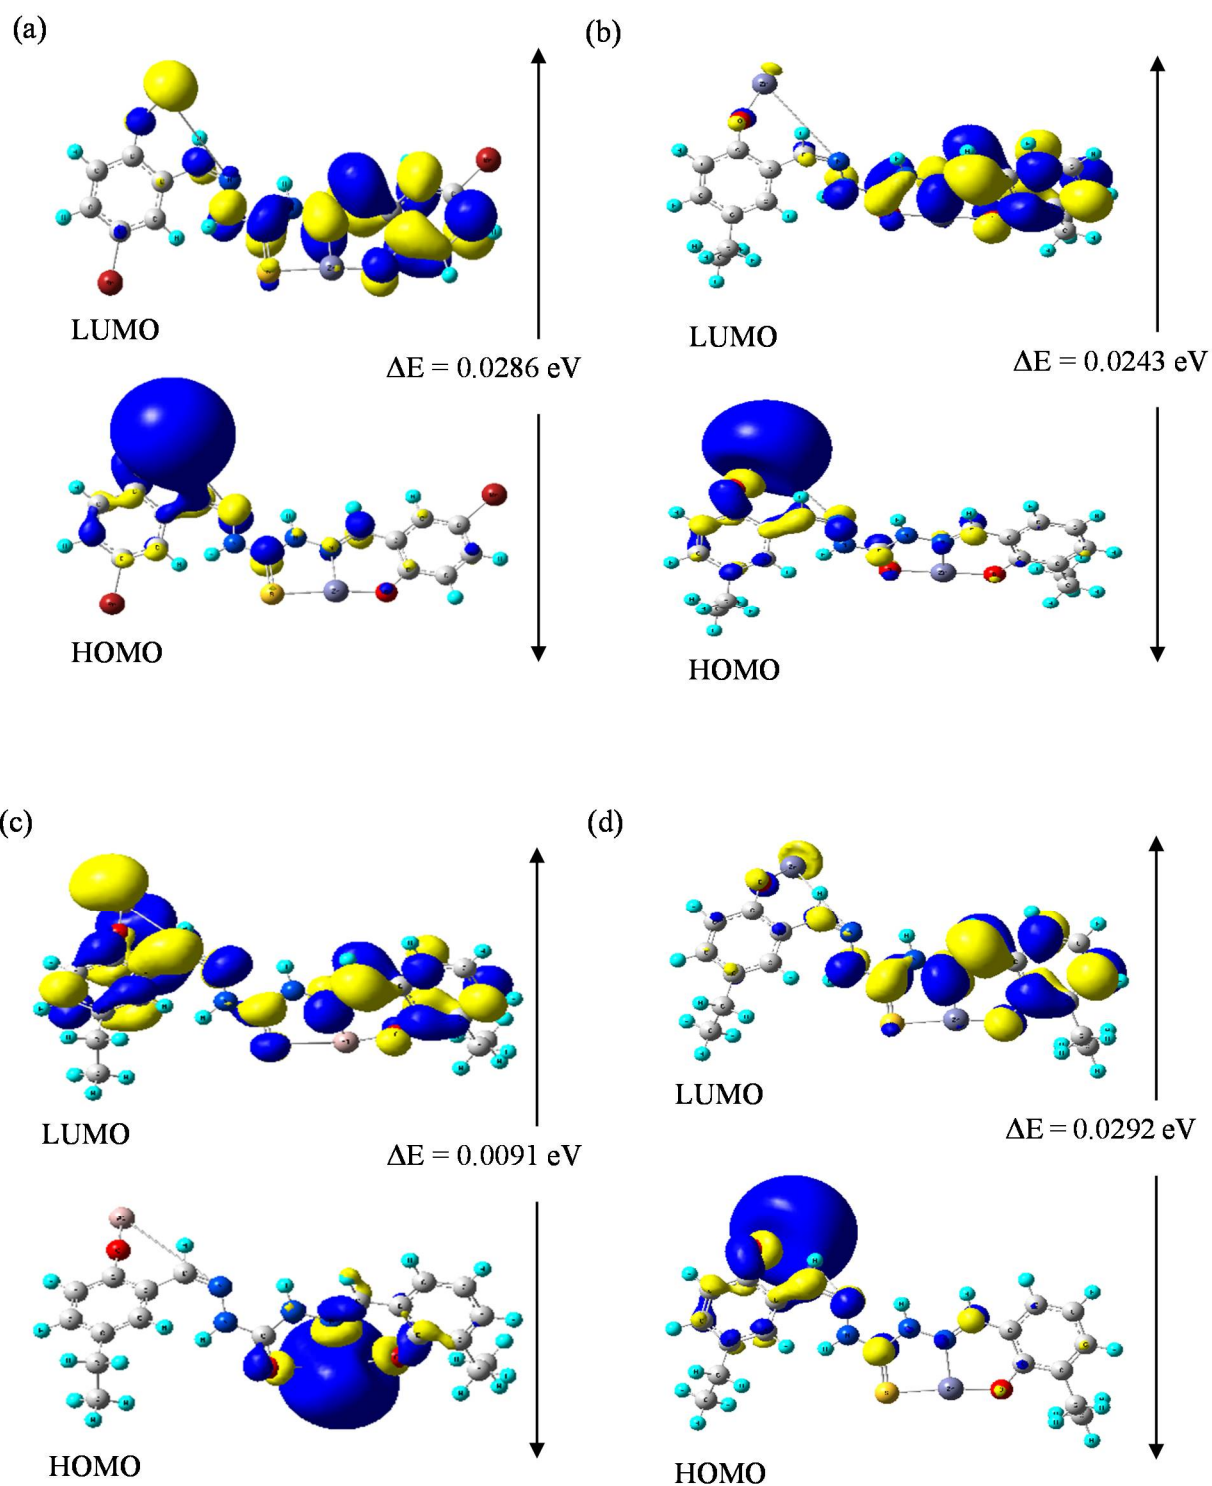

**Fig. S35** Frontier molecular orbitals of the chemosensors R2, R3 and R4 upon binding with Zn<sup>2+</sup> and Al<sup>3+</sup> cations: R2 + Zn<sup>2+</sup> (a), R3 + Zn<sup>2+</sup> (b), R3 + Al<sup>3+</sup> (c) and R4 + Zn<sup>2+</sup> (d).

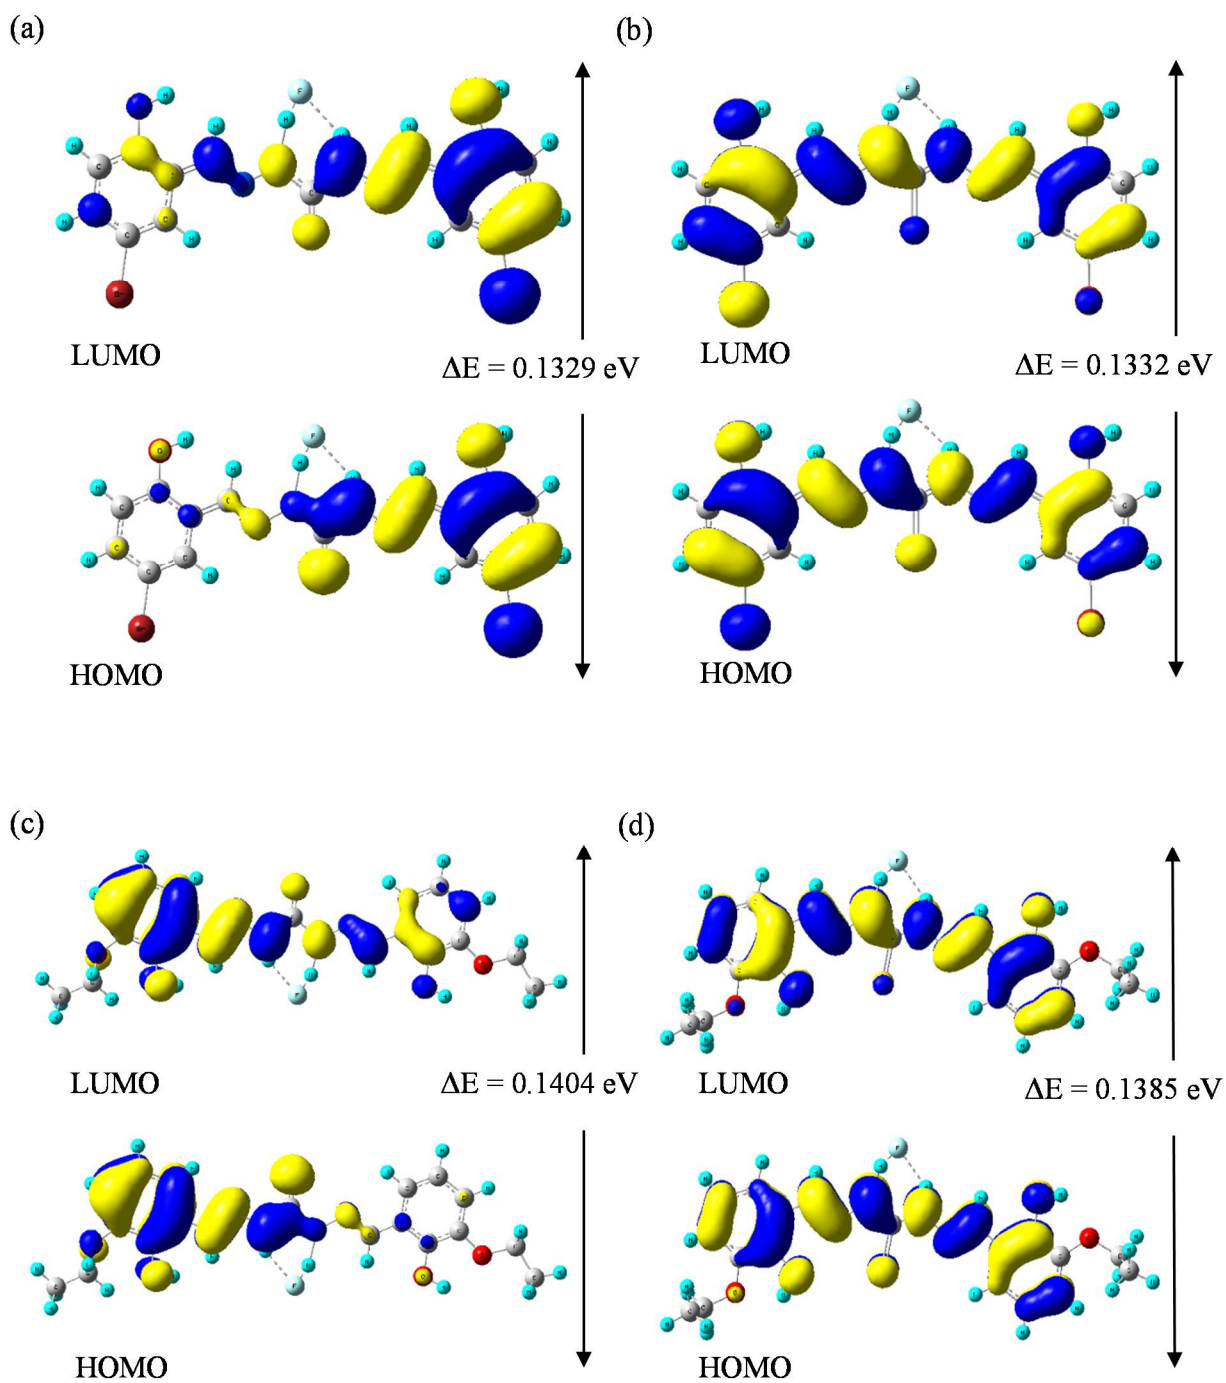

**Fig. S36** Frontier molecular orbitals of the chemosensors (R1–R4) upon binding with  $F^-$  anion: R1 +  $F^-$  (a), R2 +  $F^-$  (b), R3 +  $F^-$  (c) and R4 +  $F^-$  (d).

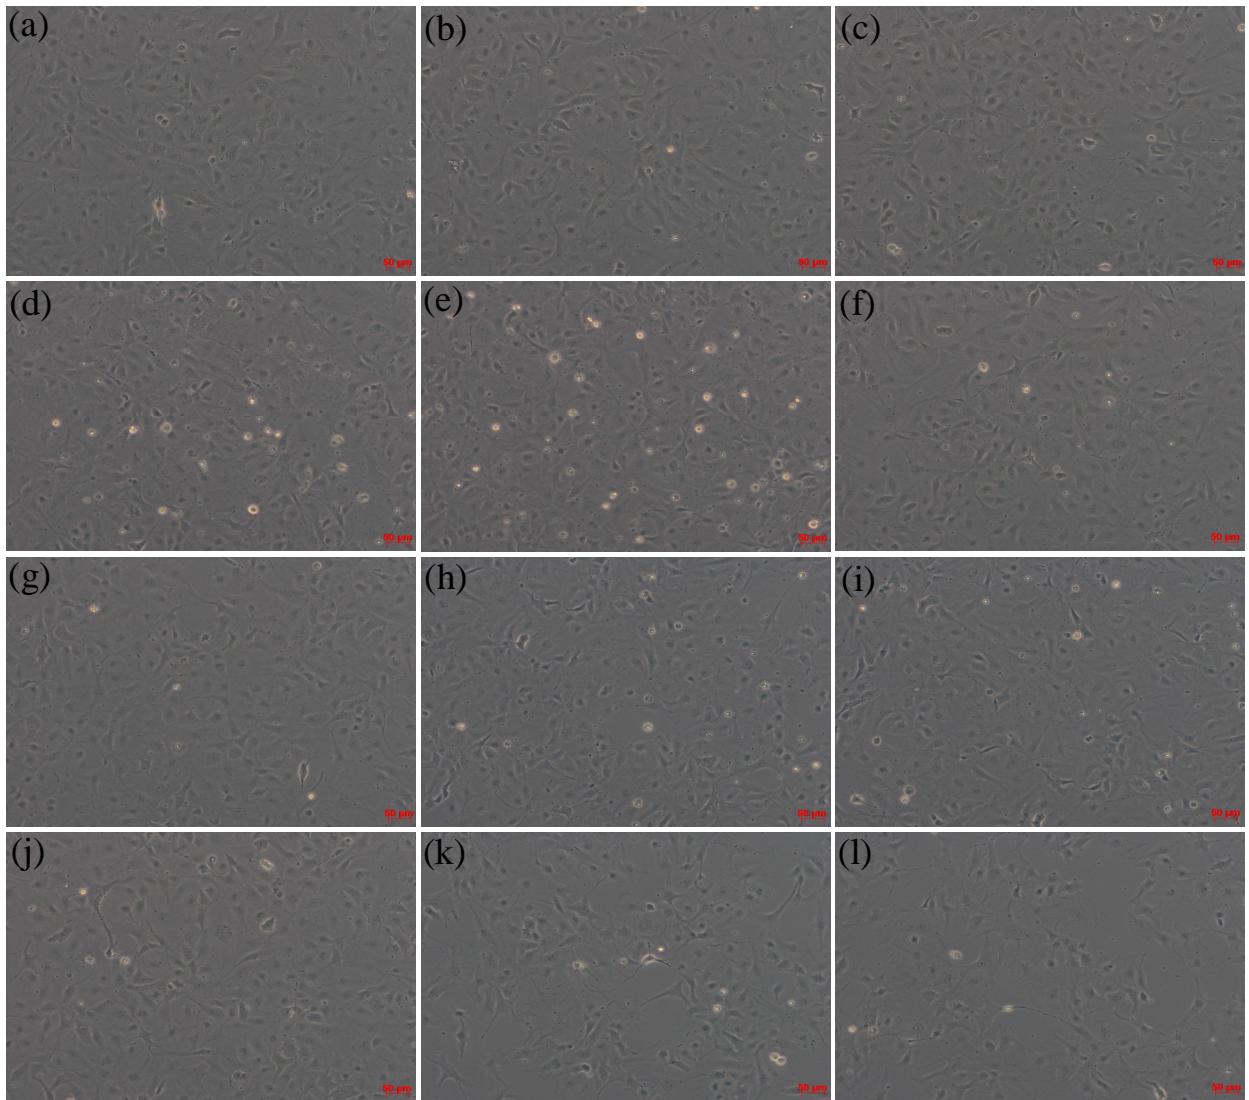

**Fig. S37** Morphological alteration of *DrG* cell lines exposed to various concentrations of R1 and R3 for 24 h: Control cells (a), cells exposed to 20  $\mu\text{M}$  of R1 (b), cells exposed to 40  $\mu\text{M}$  of R1 (c), cells exposed to 60  $\mu\text{M}$  of R1 (d), cells exposed to 80  $\mu\text{M}$  of R1 (e) and cells exposed to 100  $\mu\text{M}$  of R1 (f); Control cells (g), cells exposed to 20  $\mu\text{M}$  of R3 (h), cells exposed to 40  $\mu\text{M}$  of R3 (i), cells exposed to 60  $\mu\text{M}$  of R3 (j), cells exposed to 80  $\mu\text{M}$  of R3 (k) and cells exposed to 100  $\mu\text{M}$  of R3 (l); Images captured at 100  $\times$  magnification.

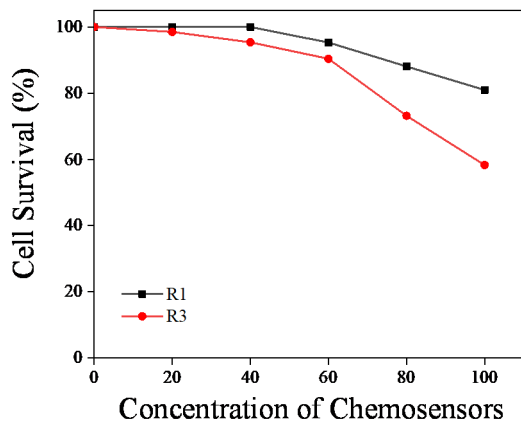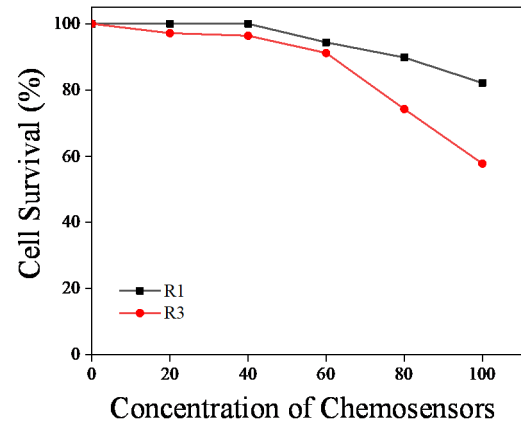

**Fig. S38** *In vitro* cytotoxicity of the chemosensors R1 and R3 on *DrG* cell lines after 24 h exposure by MTT (a) and NR uptake (b) assays; The individual data points are expressed as the arithmetic mean percentage of control (mean  $\pm$  SE; n = 8 replicate).
